# Supplementary material
Source: PubMed Central journal article supplement (PMC3902176)
Supplement: NIHMS10339-supplement-Supplemental_GOMaps.pdf [file NIHMS10339-supplement-Supplemental_GOMaps.pdf]

Online Supplement: GoMiner Analysis Output

| GO ID | Total | Down | Up | Changed | P-Value<br>(Down) | P-Value<br>(Up) | P-Value<br>(Changed) | Term                                                                      |
|-------|-------|------|----|---------|-------------------|-----------------|----------------------|---------------------------------------------------------------------------|
| 6817  | 26    | 8    | 2  | 10      | 0                 | 0.1006          |                      | 0 phosphate transport                                                     |
| 5201  | 39    | 11   | 2  | 13      | 0                 | 0.1938          |                      | 0 extracellular matrix structural constituent                             |
| 30020 | 10    | 6    | 0  | 6       | 0                 | 1               |                      | 0 extracellular matrix structural constituent conferring tensile strength |
| 5583  | 9     | 7    | 0  | 7       | 0                 | 1               |                      | 0 fibrillar collagen                                                      |
| 5581  | 13    | 7    | 0  | 7       | 0                 | 1               |                      | 0 collagen                                                                |
| 6631  | 93    | 3    | 12 | 15      | 0.5099            | 0               |                      | 0 fatty acid metabolism                                                   |
| 5588  | 3     | 3    | 0  | 3       | 0                 | 1               | 0.0001               | collagen type V                                                           |
| 5578  | 194   | 19   | 3  | 22      | 0                 | 0.7764          | 0.0002               | extracellular matrix                                                      |
| 30198 | 44    | 6    | 3  | 9       | 0.0015            | 0.0623          | 0.0002               | extracellular matrix organization and biogenesis                          |
| 43062 | 44    | 6    | 3  | 9       | 0.0015            | 0.0623          | 0.0002               | extracellular structure organization and biogenesis                       |
| 15698 | 77    | 9    | 3  | 12      | 0.0003            | 0.2145          | 0.0004               | inorganic anion transport                                                 |
| 6635  | 15    | 0    | 5  | 5       | 1                 | 0               | 0.0006               | fatty acid beta-oxidation                                                 |
| 6820  | 108   | 10   | 4  | 14      | 0.001             | 0.1857          | 0.0008               | anion transport                                                           |
| 5739  | 273   | 8    | 18 | 26      | 0.5414            | 0               | 0.0009               | mitochondrion                                                             |
| 1501  | 98    | 13   | 0  | 13      | 0                 | 1               | 0.001                | skeletal development                                                      |
| 19395 | 17    | 0    | 5  | 5       | 1                 | 0               | 0.0011               | fatty acid oxidation                                                      |
| 19752 | 206   | 5    | 16 | 21      | 0.7219            | 0               | 0.0012               | carboxylic acid metabolism                                                |
| 6082  | 208   | 5    | 16 | 21      | 0.7299            | 0               | 0.0013               | organic acid metabolism                                                   |
| 6975  | 2     | 2    | 0  | 2       | 0.0008            | 1               | 0.0025               | DNA damage induced protein phosphorylation                                |
| 4312  | 2     | 1    | 1  | 2       | 0.0572            | 0.0411          | 0.0025               | fatty-acid synthase activity                                              |
| 50729 | 2     | 1    | 1  | 2       | 0.0572            | 0.0411          | 0.0025               | positive regulation of inflammatory response                              |
| 16746 | 49    | 1    | 7  | 8       | 0.7655            | 0.0001          | 0.0025               | transferase activity, transferring acyl groups                            |
| 4466  | 2     | 0    | 2  | 2       | 1                 | 0.0004          | 0.0025               | long-chain-acyl-CoA dehydrogenase activity                                |
| 5520  | 13    | 2    | 2  | 4       | 0.0528            | 0.0287          | 0.003                | insulin-like growth factor binding                                        |
| 30247 | 52    | 7    | 1  | 8       | 0.0007            | 0.6667          | 0.0037               | polysaccharide binding                                                    |
| 5539  | 52    | 7    | 1  | 8       | 0.0007            | 0.6667          | 0.0037               | glycosaminoglycan binding                                                 |
| 6084  | 7     | 0    | 3  | 3       | 1                 | 0.0003          | 0.0037               | acetyl-CoA metabolism                                                     |
| 6811  | 391   | 23   | 8  | 31      | 0.0007            | 0.5735          | 0.0054               | ion transport                                                             |
| 1871  | 56    | 7    | 1  | 8       | 0.001             | 0.6939          | 0.0059               | pattern binding                                                           |
| 16747 | 45    | 1    | 6  | 7       | 0.7358            | 0.0003          | 0.0062               | transferase activity, transferring groups other than amino-acyl groups    |
| 8415  | 45    | 1    | 6  | 7       | 0.7358            | 0.0003          | 0.0062               | acyltransferase activity                                                  |
| 47498 | 3     | 2    | 0  | 2       | 0.0025            | 1               | 0.0072               | calcium-dependent phospholipase A2 activity                               |
| 5584  | 3     | 2    | 0  | 2       | 0.0025            | 1               | 0.0072               | collagen type I                                                           |

|       |      |    |    |     |        |        |        |                                                                             |
|-------|------|----|----|-----|--------|--------|--------|-----------------------------------------------------------------------------|
| 45089 | 3    | 1  | 1  | 2   | 0.0845 | 0.0611 | 0.0072 | positive regulation of innate immune response                               |
| 16416 | 3    | 0  | 2  | 2   | 1      | 0.0013 | 0.0072 | O-palmitoyltransferase activity                                             |
| 16409 | 3    | 0  | 2  | 2   | 1      | 0.0013 | 0.0072 | palmitoyltransferase activity                                               |
| 4095  | 3    | 0  | 2  | 2   | 1      | 0.0013 | 0.0072 | carnitine O-palmitoyltransferase activity                                   |
| 5518  | 9    | 3  | 0  | 3   | 0.0018 | 1      | 0.0082 | collagen binding                                                            |
| 5509  | 229  | 20 | 0  | 20  | 0      | 1      | 0.0091 | calcium ion binding                                                         |
| 6629  | 277  | 9  | 14 | 23  | 0.4118 | 0.0015 | 0.0096 | lipid metabolism                                                            |
| 43167 | 516  | 29 | 8  | 37  | 0.0003 | 0.8579 | 0.0122 | ion binding                                                                 |
| 46872 | 516  | 29 | 8  | 37  | 0.0003 | 0.8579 | 0.0122 | metal ion binding                                                           |
| 8152  | 2089 | 64 | 56 | 120 | 0.2935 | 0.004  | 0.0131 | metabolism                                                                  |
| 5198  | 253  | 14 | 7  | 21  | 0.0138 | 0.2712 | 0.0132 | structural molecule activity                                                |
| 4768  | 4    | 2  | 0  | 2   | 0.0048 | 1      | 0.0138 | stearoyl-CoA 9-desaturase activity                                          |
| 16215 | 4    | 2  | 0  | 2   | 0.0048 | 1      | 0.0138 | CoA desaturase activity                                                     |
| 9071  | 4    | 2  | 0  | 2   | 0.0048 | 1      | 0.0138 | serine family amino acid catabolism                                         |
| 50930 | 4    | 2  | 0  | 2   | 0.0048 | 1      | 0.0138 | induction of positive chemotaxis                                            |
| 50927 | 4    | 2  | 0  | 2   | 0.0048 | 1      | 0.0138 | positive regulation of positive chemotaxis                                  |
| 50926 | 4    | 2  | 0  | 2   | 0.0048 | 1      | 0.0138 | regulation of positive chemotaxis                                           |
| 50918 | 4    | 2  | 0  | 2   | 0.0048 | 1      | 0.0138 | positive chemotaxis                                                         |
| 19903 | 4    | 1  | 1  | 2   | 0.1111 | 0.0806 | 0.0138 | protein phosphatase binding                                                 |
| 19902 | 4    | 1  | 1  | 2   | 0.1111 | 0.0806 | 0.0138 | phosphatase binding                                                         |
| 50778 | 4    | 1  | 1  | 2   | 0.1111 | 0.0806 | 0.0138 | positive regulation of immune response                                      |
| 16406 | 4    | 0  | 2  | 2   | 1      | 0.0025 | 0.0138 | carnitine O-acyltransferase activity                                        |
| 4623  | 11   | 3  | 0  | 3   | 0.0033 | 1      | 0.0149 | phospholipase A2 activity                                                   |
| 8201  | 42   | 5  | 1  | 6   | 0.0068 | 0.5878 | 0.0165 | heparin binding                                                             |
| 16830 | 21   | 1  | 3  | 4   | 0.4617 | 0.0088 | 0.0183 | carbon-carbon lyase activity                                                |
| 16324 | 21   | 1  | 3  | 4   | 0.4617 | 0.0088 | 0.0183 | apical plasma membrane                                                      |
| 8374  | 12   | 0  | 3  | 3   | 1      | 0.0017 | 0.0191 | O-acyltransferase activity                                                  |
| 50808 | 32   | 3  | 2  | 5   | 0.0641 | 0.142  | 0.0195 | synapse organization and biogenesis                                         |
| 16765 | 32   | 2  | 3  | 5   | 0.2371 | 0.0278 | 0.0195 | transferase activity, transferring alkyl or aryl (other than methyl) groups |
| 16829 | 82   | 3  | 6  | 9   | 0.4267 | 0.0067 | 0.0196 | lyase activity                                                              |
| 16491 | 264  | 9  | 12 | 21  | 0.3567 | 0.0077 | 0.0205 | oxidoreductase activity                                                     |
| 8203  | 33   | 2  | 3  | 5   | 0.248  | 0.0302 | 0.0221 | cholesterol metabolism                                                      |
| 30833 | 5    | 2  | 0  | 2   | 0.0079 | 1      | 0.0223 | regulation of actin filament polymerization                                 |
| 50921 | 5    | 2  | 0  | 2   | 0.0079 | 1      | 0.0223 | positive regulation of chemotaxis                                           |
| 50920 | 5    | 2  | 0  | 2   | 0.0079 | 1      | 0.0223 | regulation of chemotaxis                                                    |
| 48169 | 5    | 2  | 0  | 2   | 0.0079 | 1      | 0.0223 | regulation of long-term neuronal synaptic plasticity                        |
| 8147  | 5    | 2  | 0  | 2   | 0.0079 | 1      | 0.0223 | structural constituent of bone                                              |

|       |      |     |    |     |        |        |                                                           |
|-------|------|-----|----|-----|--------|--------|-----------------------------------------------------------|
| 4712  | 5    | 1   | 1  | 2   | 0.1369 | 0.0997 | 0.0223 protein threonine/tyrosine kinase activity         |
| 45445 | 5    | 1   | 1  | 2   | 0.1369 | 0.0997 | 0.0223 myoblast differentiation                           |
| 16408 | 5    | 0   | 2  | 2   | 1      | 0.0041 | 0.0223 C-acyltransferase activity                         |
| 4300  | 5    | 0   | 2  | 2   | 1      | 0.0041 | 0.0223 enoyl-CoA hydratase activity                       |
| 902   | 112  | 8   | 3  | 11  | 0.0152 | 0.4132 | 0.0224 cellular morphogenesis                             |
| 43169 | 435  | 27  | 4  | 31  | 0.0001 | 0.9846 | 0.0234 cation binding                                     |
| 45595 | 58   | 4   | 3  | 7   | 0.0862 | 0.1185 | 0.0237 regulation of cell differentiation                 |
| 50793 | 128  | 8   | 4  | 12  | 0.0312 | 0.2749 | 0.0243 regulation of development                          |
| 9968  | 23   | 3   | 1  | 4   | 0.0276 | 0.3838 | 0.0251 negative regulation of signal transduction         |
| 7582  | 3385 | 102 | 77 | 179 | 0.2124 | 0.0347 | 0.0282 physiological process                              |
| 6066  | 133  | 5   | 7  | 12  | 0.342  | 0.0197 | 0.0317 alcohol metabolism                                 |
| 4684  | 6    | 2   | 0  | 2   | 0.0116 | 1      | 0.0324 calmodulin-dependent protein kinase I activity     |
| 30041 | 6    | 2   | 0  | 2   | 0.0116 | 1      | 0.0324 actin filament polymerization                      |
| 45177 | 6    | 0   | 2  | 2   | 1      | 0.0061 | 0.0324 apical part of cell                                |
| 3995  | 6    | 0   | 2  | 2   | 1      | 0.0061 | 0.0324 acyl-CoA dehydrogenase activity                    |
| 19866 | 62   | 3   | 4  | 7   | 0.2674 | 0.0389 | 0.0329 inner membrane                                     |
| 1503  | 37   | 5   | 0  | 5   | 0.0039 | 1      | 0.0346 ossification                                       |
| 16053 | 37   | 3   | 2  | 5   | 0.0906 | 0.1787 | 0.0346 organic acid biosynthesis                          |
| 46394 | 37   | 3   | 2  | 5   | 0.0906 | 0.1787 | 0.0346 carboxylic acid biosynthesis                       |
| 7155  | 247  | 14  | 5  | 19  | 0.0113 | 0.5903 | 0.0365 cell adhesion                                      |
| 9057  | 264  | 13  | 7  | 20  | 0.0405 | 0.3079 | 0.0371 macromolecule catabolism                           |
| 16125 | 38   | 2   | 3  | 5   | 0.3022 | 0.0433 | 0.0383 sterol metabolism                                  |
| 3824  | 1580 | 48  | 43 | 91  | 0.3712 | 0.0159 | 0.0413 catalytic activity                                 |
| 48168 | 16   | 3   | 0  | 3   | 0.0101 | 1      | 0.0421 regulation of neuronal synaptic plasticity         |
| 30246 | 109  | 9   | 1  | 10  | 0.004  | 0.9017 | 0.0433 carbohydrate binding                               |
| 6144  | 7    | 2   | 0  | 2   | 0.0159 | 1      | 0.0439 purine base metabolism                             |
| 9894  | 7    | 2   | 0  | 2   | 0.0159 | 1      | 0.0439 regulation of catabolism                           |
| 15270 | 7    | 2   | 0  | 2   | 0.0159 | 1      | 0.0439 dihydropyridine-sensitive calcium channel activity |
| 4697  | 7    | 1   | 1  | 2   | 0.1862 | 0.1368 | 0.0439 protein kinase C activity                          |
| 19239 | 7    | 1   | 1  | 2   | 0.1862 | 0.1368 | 0.0439 deaminase activity                                 |
| 50727 | 7    | 1   | 1  | 2   | 0.1862 | 0.1368 | 0.0439 regulation of inflammatory response                |
| 5315  | 7    | 0   | 2  | 2   | 1      | 0.0084 | 0.0439 inorganic phosphate transporter activity           |
| 50767 | 28   | 4   | 0  | 4   | 0.008  | 1      | 0.0478 regulation of neurogenesis                         |
| 9056  | 374  | 17  | 9  | 26  | 0.0399 | 0.3734 | 0.0478 catabolism                                         |
| 7050  | 28   | 3   | 1  | 4   | 0.046  | 0.4456 | 0.0478 cell cycle arrest                                  |
| 4683  | 17   | 3   | 0  | 3   | 0.012  | 1      | 0.0493 calmodulin regulated protein kinase activity       |
| 3754  | 17   | 2   | 1  | 3   | 0.0854 | 0.3007 | 0.0493 chaperone activity                                 |

|       |   |   |   |   |       |   |                                                                      |
|-------|---|---|---|---|-------|---|----------------------------------------------------------------------|
| 6379  | 1 | 1 | 0 | 1 | 0.029 | 1 | 0.0498 mRNA cleavage                                                 |
| 18223 | 1 | 1 | 0 | 1 | 0.029 | 1 | 0.0498 protein-cysteine farnesyltransferase activity                 |
| 6123  | 1 | 1 | 0 | 1 | 0.029 | 1 | 0.0498 mitochondrial electron transport, cytochrome c to oxygen      |
| 4998  | 1 | 1 | 0 | 1 | 0.029 | 1 | 0.0498 transferrin receptor activity                                 |
| 16931 | 1 | 1 | 0 | 1 | 0.029 | 1 | 0.0498 vasopressin activated calcium mobilizing receptor activity    |
| 16910 | 1 | 1 | 0 | 1 | 0.029 | 1 | 0.0498 SAP kinase 3 activity                                         |
| 4903  | 1 | 1 | 0 | 1 | 0.029 | 1 | 0.0498 growth hormone receptor activity                              |
| 4720  | 1 | 1 | 0 | 1 | 0.029 | 1 | 0.0498 protein-lysine 6-oxidase activity                             |
| 4698  | 1 | 1 | 0 | 1 | 0.029 | 1 | 0.0498 calcium-dependent protein kinase C activity                   |
| 4686  | 1 | 1 | 0 | 1 | 0.029 | 1 | 0.0498 eukaryotic elongation factor-2 kinase activity                |
| 4586  | 1 | 1 | 0 | 1 | 0.029 | 1 | 0.0498 ornithine decarboxylase activity                              |
| 42761 | 1 | 1 | 0 | 1 | 0.029 | 1 | 0.0498 very-long-chain fatty acid biosynthesis                       |
| 16420 | 1 | 1 | 0 | 1 | 0.029 | 1 | 0.0498 malonyltransferase activity                                   |
| 16419 | 1 | 1 | 0 | 1 | 0.029 | 1 | 0.0498 S-malonyltransferase activity                                 |
| 4367  | 1 | 1 | 0 | 1 | 0.029 | 1 | 0.0498 glycerol-3-phosphate dehydrogenase (NAD+) activity            |
| 4320  | 1 | 1 | 0 | 1 | 0.029 | 1 | 0.0498 oleoyl-[acyl-carrier protein] hydrolase activity              |
| 4314  | 1 | 1 | 0 | 1 | 0.029 | 1 | 0.0498 [acyl-carrier protein] S-malonyltransferase activity          |
| 16297 | 1 | 1 | 0 | 1 | 0.029 | 1 | 0.0498 acyl-[acyl-carrier protein] hydrolase activity                |
| 16296 | 1 | 1 | 0 | 1 | 0.029 | 1 | 0.0498 palmitoyl-[acyl-carrier protein] hydrolase activity           |
| 16295 | 1 | 1 | 0 | 1 | 0.029 | 1 | 0.0498 myristoyl-[acyl-carrier protein] hydrolase activity           |
| 4248  | 1 | 1 | 0 | 1 | 0.029 | 1 | 0.0498 stromelysin 1 activity                                        |
| 30322 | 1 | 1 | 0 | 1 | 0.029 | 1 | 0.0498 stabilization of membrane potential                           |
| 42176 | 1 | 1 | 0 | 1 | 0.029 | 1 | 0.0498 regulation of protein catabolism                              |
| 30023 | 1 | 1 | 0 | 1 | 0.029 | 1 | 0.0498 extracellular matrix constituent conferring elasticity        |
| 45917 | 1 | 1 | 0 | 1 | 0.029 | 1 | 0.0498 positive regulation of complement activation                  |
| 45669 | 1 | 1 | 0 | 1 | 0.029 | 1 | 0.0498 positive regulation of osteoblast differentiation             |
| 45601 | 1 | 1 | 0 | 1 | 0.029 | 1 | 0.0498 regulation of endothelial cell differentiation                |
| 7170  | 1 | 1 | 0 | 1 | 0.029 | 1 | 0.0498 transmembrane receptor protein tyrosine kinase ligand binding |
| 45340 | 1 | 1 | 0 | 1 | 0.029 | 1 | 0.0498 mercury ion binding                                           |
| 5592  | 1 | 1 | 0 | 1 | 0.029 | 1 | 0.0498 collagen type XI                                              |
| 5586  | 1 | 1 | 0 | 1 | 0.029 | 1 | 0.0498 collagen type III                                             |
| 5290  | 1 | 1 | 0 | 1 | 0.029 | 1 | 0.0498 L-histidine transporter activity                              |
| 17172 | 1 | 1 | 0 | 1 | 0.029 | 1 | 0.0498 cysteine dioxygenase activity                                 |
| 17147 | 1 | 1 | 0 | 1 | 0.029 | 1 | 0.0498 Wnt-protein binding                                           |
| 48251 | 1 | 1 | 0 | 1 | 0.029 | 1 | 0.0498 elastic fiber assembly                                        |
| 48155 | 1 | 1 | 0 | 1 | 0.029 | 1 | 0.0498 S100 alpha binding                                            |
| 48154 | 1 | 1 | 0 | 1 | 0.029 | 1 | 0.0498 S100 beta binding                                             |

|       |   |   |   |   |       |        |                                                                          |
|-------|---|---|---|---|-------|--------|--------------------------------------------------------------------------|
| 48151 | 1 | 1 | 0 | 1 | 0.029 | 1      | 0.0498 hyperphosphorylation                                              |
| 48143 | 1 | 1 | 0 | 1 | 0.029 | 1      | 0.0498 astrocyte activation                                              |
| 164   | 1 | 1 | 0 | 1 | 0.029 | 1      | 0.0498 protein phosphatase type 1 complex                                |
| 43149 | 1 | 1 | 0 | 1 | 0.029 | 1      | 0.0498 stress fiber formation                                            |
| 15817 | 1 | 1 | 0 | 1 | 0.029 | 1      | 0.0498 L-histidine transport                                             |
| 15732 | 1 | 1 | 0 | 1 | 0.029 | 1      | 0.0498 prostaglandin transport                                           |
| 15271 | 1 | 1 | 0 | 1 | 0.029 | 1      | 0.0498 outward rectifier potassium channel activity                      |
| 46325 | 1 | 1 | 0 | 1 | 0.029 | 1      | 0.0498 negative regulation of glucose import                             |
| 10003 | 1 | 0 | 1 | 1 | 1     | 0.0208 | 0.0498 gastrulation (sensu Mammalia)                                     |
| 6798  | 1 | 0 | 1 | 1 | 1     | 0.0208 | 0.0498 polyphosphate catabolism                                          |
| 6797  | 1 | 0 | 1 | 1 | 1     | 0.0208 | 0.0498 polyphosphate metabolism                                          |
| 1762  | 1 | 0 | 1 | 1 | 1     | 0.0208 | 0.0498 beta-alanine transport                                            |
| 1761  | 1 | 0 | 1 | 1 | 1     | 0.0208 | 0.0498 beta-alanine transporter activity                                 |
| 1702  | 1 | 0 | 1 | 1 | 1     | 0.0208 | 0.0498 gastrulation (sensu Deuterostomia)                                |
| 4940  | 1 | 0 | 1 | 1 | 1     | 0.0208 | 0.0498 beta1-adrenergic receptor activity                                |
| 16833 | 1 | 0 | 1 | 1 | 1     | 0.0208 | 0.0498 oxo-acid-lyase activity                                           |
| 4772  | 1 | 0 | 1 | 1 | 1     | 0.0208 | 0.0498 sterol O-acyltransferase activity                                 |
| 16724 | 1 | 0 | 1 | 1 | 1     | 0.0208 | 0.0498 oxidoreductase activity, oxidizing metal ions, oxygen as acceptor |
| 16722 | 1 | 0 | 1 | 1 | 1     | 0.0208 | 0.0498 oxidoreductase activity, oxidizing metal ions                     |
| 51041 | 1 | 0 | 1 | 1 | 1     | 0.0208 | 0.0498 positive regulation of calcium-independent cell-cell adhesion     |
| 51040 | 1 | 0 | 1 | 1 | 1     | 0.0208 | 0.0498 regulation of calcium-independent cell-cell adhesion              |
| 30881 | 1 | 0 | 1 | 1 | 1     | 0.0208 | 0.0498 beta-2-microglobulin binding                                      |
| 16509 | 1 | 0 | 1 | 1 | 1     | 0.0208 | 0.0498 long-chain-3-hydroxyacyl-CoA dehydrogenase activity               |
| 9399  | 1 | 0 | 1 | 1 | 1     | 0.0208 | 0.0498 nitrogen fixation                                                 |
| 4492  | 1 | 0 | 1 | 1 | 1     | 0.0208 | 0.0498 methylmalonyl-CoA decarboxylase activity                          |
| 4419  | 1 | 0 | 1 | 1 | 1     | 0.0208 | 0.0498 hydroxymethylglutaryl-CoA lyase activity                          |
| 16338 | 1 | 0 | 1 | 1 | 1     | 0.0208 | 0.0498 calcium-independent cell-cell adhesion                            |
| 4356  | 1 | 0 | 1 | 1 | 1     | 0.0208 | 0.0498 glutamate-ammonia ligase activity                                 |
| 4322  | 1 | 0 | 1 | 1 | 1     | 0.0208 | 0.0498 ferroxidase activity                                              |
| 4316  | 1 | 0 | 1 | 1 | 1     | 0.0208 | 0.0498 3-oxoacyl-[acyl-carrier protein] reductase activity               |
| 4281  | 1 | 0 | 1 | 1 | 1     | 0.0208 | 0.0498 pancreatic elastase II activity                                   |
| 4096  | 1 | 0 | 1 | 1 | 1     | 0.0208 | 0.0498 catalase activity                                                 |
| 19433 | 1 | 0 | 1 | 1 | 1     | 0.0208 | 0.0498 triacylglycerol catabolism                                        |
| 45663 | 1 | 0 | 1 | 1 | 1     | 0.0208 | 0.0498 positive regulation of myoblast differentiation                   |
| 45661 | 1 | 0 | 1 | 1 | 1     | 0.0208 | 0.0498 regulation of myoblast differentiation                            |
| 19211 | 1 | 0 | 1 | 1 | 1     | 0.0208 | 0.0498 phosphatase activator activity                                    |
| 45294 | 1 | 0 | 1 | 1 | 1     | 0.0208 | 0.0498 alpha-catenin binding                                             |

|       |     |    |    |    |        |        |        |                                                                               |
|-------|-----|----|----|----|--------|--------|--------|-------------------------------------------------------------------------------|
| 45136 | 1   | 0  | 1  | 1  | 1      | 0.0208 | 0.0498 | development of secondary sexual characteristics                               |
| 5932  | 1   | 0  | 1  | 1  | 1      | 0.0208 | 0.0498 | basal body                                                                    |
| 5610  | 1   | 0  | 1  | 1  | 1      | 0.0208 | 0.0498 | laminin-5                                                                     |
| 50902 | 1   | 0  | 1  | 1  | 1      | 0.0208 | 0.0498 | leukocyte adhesive activation                                                 |
| 5476  | 1   | 0  | 1  | 1  | 1      | 0.0208 | 0.0498 | carnitine:acyl carnitine carrier activity                                     |
| 5369  | 1   | 0  | 1  | 1  | 1      | 0.0208 | 0.0498 | taurine:sodium symporter activity                                             |
| 5368  | 1   | 0  | 1  | 1  | 1      | 0.0208 | 0.0498 | taurine transporter activity                                                  |
| 48276 | 1   | 0  | 1  | 1  | 1      | 0.0208 | 0.0498 | gastrulation (sensu Vertebrata)                                               |
| 299   | 1   | 0  | 1  | 1  | 1      | 0.0208 | 0.0498 | integral to membrane of membrane fraction                                     |
| 3955  | 1   | 0  | 1  | 1  | 1      | 0.0208 | 0.0498 | NAD(P)H dehydrogenase (quinone) activity                                      |
| 3945  | 1   | 0  | 1  | 1  | 1      | 0.0208 | 0.0498 | N-acetyllactosamine synthase activity                                         |
| 3831  | 1   | 0  | 1  | 1  | 1      | 0.0208 | 0.0498 | beta-N-acetylglucosaminylglycopeptide beta-1,4-galactosyltransferase activity |
| 46951 | 1   | 0  | 1  | 1  | 1      | 0.0208 | 0.0498 | ketone body biosynthesis                                                      |
| 46950 | 1   | 0  | 1  | 1  | 1      | 0.0208 | 0.0498 | ketone body metabolism                                                        |
| 15734 | 1   | 0  | 1  | 1  | 1      | 0.0208 | 0.0498 | taurine transport                                                             |
| 50080 | 1   | 0  | 1  | 1  | 1      | 0.0208 | 0.0498 | malonyl-CoA decarboxylase activity                                            |
| 15679 | 1   | 0  | 1  | 1  | 1      | 0.0208 | 0.0498 | plasma membrane copper ion transport                                          |
| 3692  | 1   | 0  | 1  | 1  | 1      | 0.0208 | 0.0498 | left-handed Z-DNA binding                                                     |
| 46503 | 1   | 0  | 1  | 1  | 1      | 0.0208 | 0.0498 | glycerolipid catabolism                                                       |
| 46464 | 1   | 0  | 1  | 1  | 1      | 0.0208 | 0.0498 | acylglycerol catabolism                                                       |
| 46461 | 1   | 0  | 1  | 1  | 1      | 0.0208 | 0.0498 | neutral lipid catabolism                                                      |
| 8160  | 1   | 0  | 1  | 1  | 1      | 0.0208 | 0.0498 | protein tyrosine phosphatase activator activity                               |
| 46340 | 1   | 0  | 1  | 1  | 1      | 0.0208 | 0.0498 | diacylglycerol catabolism                                                     |
| 82    | 29  | 4  | 0  | 4  | 0.0091 | 1      | 0.0534 | G1/S transition of mitotic cell cycle                                         |
| 6633  | 29  | 3  | 1  | 4  | 0.0502 | 0.4572 | 0.0534 | fatty acid biosynthesis                                                       |
| 5743  | 55  | 3  | 3  | 6  | 0.2129 | 0.1052 | 0.0538 | mitochondrial inner membrane                                                  |
| 16740 | 520 | 18 | 16 | 34 | 0.2434 | 0.0667 | 0.0539 | transferase activity                                                          |
| 4685  | 8   | 2  | 0  | 2  | 0.0208 | 1      | 0.0566 | calcium- and calmodulin-dependent protein kinase activity                     |
| 7613  | 8   | 2  | 0  | 2  | 0.0208 | 1      | 0.0566 | memory                                                                        |
| 4864  | 8   | 1  | 1  | 2  | 0.2099 | 0.1547 | 0.0566 | protein phosphatase inhibitor activity                                        |
| 45088 | 8   | 1  | 1  | 2  | 0.2099 | 0.1547 | 0.0566 | regulation of innate immune response                                          |
| 30595 | 18  | 2  | 1  | 3  | 0.0943 | 0.3153 | 0.0571 | immune cell chemotaxis                                                        |
| 19888 | 18  | 1  | 2  | 3  | 0.4118 | 0.0526 | 0.0571 | protein phosphatase regulator activity                                        |
| 19208 | 18  | 1  | 2  | 3  | 0.4118 | 0.0526 | 0.0571 | phosphatase regulator activity                                                |
| 5604  | 18  | 1  | 2  | 3  | 0.4118 | 0.0526 | 0.0571 | basement membrane                                                             |
| 6805  | 18  | 0  | 3  | 3  | 1      | 0.0056 | 0.0571 | xenobiotic metabolism                                                         |
| 46849 | 44  | 5  | 0  | 5  | 0.0083 | 1      | 0.0654 | bone remodeling                                                               |

|       |     |    |   |    |        |        |                                                                                               |
|-------|-----|----|---|----|--------|--------|-----------------------------------------------------------------------------------------------|
| 6928  | 231 | 12 | 5 | 17 | 0.0341 | 0.5293 | 0.0654 cell motility                                                                          |
| 45597 | 19  | 2  | 1 | 3  | 0.1035 | 0.3296 | 0.0654 positive regulation of cell differentiation                                            |
| 16042 | 44  | 3  | 2 | 5  | 0.1339 | 0.2322 | 0.0654 lipid catabolism                                                                       |
| 6979  | 44  | 1  | 4 | 5  | 0.7278 | 0.0125 | 0.0654 response to oxidative stress                                                           |
| 16627 | 19  | 0  | 3 | 3  | 1      | 0.0066 | 0.0654 oxidoreductase activity, acting on the CH-CH group of donors                           |
| 9410  | 19  | 0  | 3 | 3  | 1      | 0.0066 | 0.0654 response to xenobiotic stimulus                                                        |
| 7416  | 31  | 3  | 1 | 4  | 0.0593 | 0.4797 | 0.0655 synaptogenesis                                                                         |
| 5740  | 87  | 4  | 4 | 8  | 0.2445 | 0.1058 | 0.0661 mitochondrial membrane                                                                 |
| 4857  | 103 | 5  | 4 | 9  | 0.1777 | 0.1651 | 0.069 enzyme inhibitor activity                                                               |
| 4707  | 9   | 2  | 0 | 2  | 0.0263 | 1      | 0.0705 MAP kinase activity                                                                    |
| 9156  | 9   | 2  | 0 | 2  | 0.0263 | 1      | 0.0705 ribonucleoside monophosphate biosynthesis                                              |
| 5540  | 9   | 2  | 0 | 2  | 0.0263 | 1      | 0.0705 hyaluronic acid binding                                                                |
| 1565  | 9   | 1  | 1 | 2  | 0.2328 | 0.1723 | 0.0705 phorbol ester receptor activity                                                        |
| 16814 | 9   | 1  | 1 | 2  | 0.2328 | 0.1723 | 0.0705 hydrolase activity, acting on carbon-nitrogen (but not peptide) bonds, in cyclic amidi |
| 19212 | 9   | 1  | 1 | 2  | 0.2328 | 0.1723 | 0.0705 phosphatase inhibitor activity                                                         |
| 5890  | 9   | 1  | 1 | 2  | 0.2328 | 0.1723 | 0.0705 sodium:potassium-exchanging ATPase complex                                             |
| 16460 | 9   | 0  | 2 | 2  | 1      | 0.014  | 0.0705 myosin II                                                                              |
| 48167 | 20  | 3  | 0 | 3  | 0.0189 | 1      | 0.0742 regulation of synaptic plasticity                                                      |
| 50900 | 20  | 2  | 1 | 3  | 0.1129 | 0.3436 | 0.0742 immune cell migration                                                                  |
| 30324 | 20  | 1  | 2 | 3  | 0.4456 | 0.0637 | 0.0742 lung development                                                                       |
| 30323 | 20  | 1  | 2 | 3  | 0.4456 | 0.0637 | 0.0742 respiratory tube development                                                           |
| 16323 | 20  | 0  | 3 | 3  | 1      | 0.0076 | 0.0742 basolateral plasma membrane                                                            |
| 19318 | 75  | 3  | 4 | 7  | 0.3715 | 0.0694 | 0.0777 hexose metabolism                                                                      |
| 5996  | 75  | 3  | 4 | 7  | 0.3715 | 0.0694 | 0.0777 monosaccharide metabolism                                                              |
| 6091  | 138 | 5  | 6 | 11 | 0.3712 | 0.0658 | 0.0806 energy pathways                                                                        |
| null  | 47  | 4  | 1 | 5  | 0.046  | 0.6293 | 0.0821 obsolete_function                                                                      |
| 30832 | 10  | 2  | 0 | 2  | 0.0322 | 1      | 0.0853 regulation of actin filament length                                                    |
| 9161  | 10  | 2  | 0 | 2  | 0.0322 | 1      | 0.0853 ribonucleoside monophosphate metabolism                                                |
| 9124  | 10  | 2  | 0 | 2  | 0.0322 | 1      | 0.0853 nucleoside monophosphate biosynthesis                                                  |
| 9112  | 10  | 2  | 0 | 2  | 0.0322 | 1      | 0.0853 nucleobase metabolism                                                                  |
| 46777 | 10  | 2  | 0 | 2  | 0.0322 | 1      | 0.0853 autophosphorylation                                                                    |
| 8064  | 10  | 2  | 0 | 2  | 0.0322 | 1      | 0.0853 regulation of actin polymerization and/or depolymerization                             |
| 5391  | 10  | 1  | 1 | 2  | 0.2551 | 0.1896 | 0.0853 sodium:potassium-exchanging ATPase activity                                            |
| 7548  | 10  | 0  | 2 | 2  | 1      | 0.0172 | 0.0853 sex differentiation                                                                    |
| 5605  | 10  | 0  | 2 | 2  | 1      | 0.0172 | 0.0853 basal lamina                                                                           |
| 40007 | 108 | 7  | 2 | 9  | 0.0361 | 0.663  | 0.0872 growth                                                                                 |
| 16779 | 22  | 2  | 1 | 3  | 0.1323 | 0.3707 | 0.0933 nucleotidyltransferase activity                                                        |

|       |     |    |    |    |        |        |                                                                   |
|-------|-----|----|----|----|--------|--------|-------------------------------------------------------------------|
| 16836 | 22  | 1  | 2  | 3  | 0.4774 | 0.0754 | 0.0933 hydro-lyase activity                                       |
| 7179  | 35  | 3  | 1  | 4  | 0.0795 | 0.5219 | 0.0937 transforming growth factor beta receptor signaling pathway |
| 9653  | 789 | 35 | 12 | 47 | 0.0044 | 0.9172 | 0.096 morphogenesis                                               |
| 15186 | 2   | 1  | 0  | 1  | 0.0572 | 1      | 0.0971 L-glutamine transporter activity                           |
| 15079 | 2   | 1  | 0  | 1  | 0.0572 | 1      | 0.0971 potassium ion transporter activity                         |
| 6868  | 2   | 1  | 0  | 1  | 0.0572 | 1      | 0.0971 L-glutamine transport                                      |
| 6546  | 2   | 1  | 0  | 1  | 0.0572 | 1      | 0.0971 glycine catabolism                                         |
| 1527  | 2   | 1  | 0  | 1  | 0.0572 | 1      | 0.0971 microfibril                                                |
| 16892 | 2   | 1  | 0  | 1  | 0.0572 | 1      | 0.0971 endoribonuclease activity, producing 3'-phosphomonoesters  |
| 4886  | 2   | 1  | 0  | 1  | 0.0572 | 1      | 0.0971 retinoid-X receptor activity                               |
| 4619  | 2   | 1  | 0  | 1  | 0.0572 | 1      | 0.0971 phosphoglycerate mutase activity                           |
| 4522  | 2   | 1  | 0  | 1  | 0.0572 | 1      | 0.0971 pancreatic ribonuclease activity                           |
| 16417 | 2   | 1  | 0  | 1  | 0.0572 | 1      | 0.0971 S-acyltransferase activity                                 |
| 42564 | 2   | 1  | 0  | 1  | 0.0572 | 1      | 0.0971 NLS-dependent protein nuclear import complex               |
| 4274  | 2   | 1  | 0  | 1  | 0.0572 | 1      | 0.0971 dipeptidyl-peptidase IV activity                           |
| 9093  | 2   | 1  | 0  | 1  | 0.0572 | 1      | 0.0971 cysteine catabolism                                        |
| 4105  | 2   | 1  | 0  | 1  | 0.0572 | 1      | 0.0971 choline-phosphate cytidyltransferase activity              |
| 30346 | 2   | 1  | 0  | 1  | 0.0572 | 1      | 0.0971 protein phosphatase 2B binding                             |
| 4083  | 2   | 1  | 0  | 1  | 0.0572 | 1      | 0.0971 bisphosphoglycerate phosphatase activity                   |
| 19530 | 2   | 1  | 0  | 1  | 0.0572 | 1      | 0.0971 taurine metabolism                                         |
| 19452 | 2   | 1  | 0  | 1  | 0.0572 | 1      | 0.0971 L-cysteine catabolism to taurine                           |
| 19448 | 2   | 1  | 0  | 1  | 0.0572 | 1      | 0.0971 L-cysteine catabolism                                      |
| 45667 | 2   | 1  | 0  | 1  | 0.0572 | 1      | 0.0971 regulation of osteoblast differentiation                   |
| 7150  | 2   | 1  | 0  | 1  | 0.0572 | 1      | 0.0971 growth pattern                                             |
| 7044  | 2   | 1  | 0  | 1  | 0.0572 | 1      | 0.0971 cell-substrate junction assembly                           |
| 5960  | 2   | 1  | 0  | 1  | 0.0572 | 1      | 0.0971 glycine cleavage complex                                   |
| 5763  | 2   | 1  | 0  | 1  | 0.0572 | 1      | 0.0971 mitochondrial small ribosomal subunit                      |
| 314   | 2   | 1  | 0  | 1  | 0.0572 | 1      | 0.0971 organellar small ribosomal subunit                         |
| 48156 | 2   | 1  | 0  | 1  | 0.0572 | 1      | 0.0971 tau protein binding                                        |
| 43205 | 2   | 1  | 0  | 1  | 0.0572 | 1      | 0.0971 fibril                                                     |
| 38    | 2   | 1  | 0  | 1  | 0.0572 | 1      | 0.0971 very-long-chain fatty acid metabolism                      |
| 3876  | 2   | 1  | 0  | 1  | 0.0572 | 1      | 0.0971 AMP deaminase activity                                     |
| 46627 | 2   | 1  | 0  | 1  | 0.0572 | 1      | 0.0971 negative regulation of insulin receptor signaling pathway  |
| 8332  | 2   | 1  | 0  | 1  | 0.0572 | 1      | 0.0971 low voltage-gated calcium channel activity                 |
| 8282  | 2   | 1  | 0  | 1  | 0.0572 | 1      | 0.0971 ATP-sensitive potassium channel complex                    |
| 8281  | 2   | 1  | 0  | 1  | 0.0572 | 1      | 0.0971 sulfonylurea receptor activity                             |
| 46439 | 2   | 1  | 0  | 1  | 0.0572 | 1      | 0.0971 L-cysteine metabolism                                      |



|       |     |    |    |    |        |        |        |                                                              |
|-------|-----|----|----|----|--------|--------|--------|--------------------------------------------------------------|
| 46328 | 2   | 1  | 0  | 1  | 0.0572 | 1      | 0.0971 | regulation of JNK cascade                                    |
| 46324 | 2   | 1  | 0  | 1  | 0.0572 | 1      | 0.0971 | regulation of glucose import                                 |
| 46323 | 2   | 1  | 0  | 1  | 0.0572 | 1      | 0.0971 | glucose import                                               |
| 1798  | 2   | 0  | 1  | 1  | 1      | 0.0411 | 0.0971 | positive regulation of type IIa hypersensitivity             |
| 1796  | 2   | 0  | 1  | 1  | 1      | 0.0411 | 0.0971 | regulation of type IIa hypersensitivity                      |
| 1794  | 2   | 0  | 1  | 1  | 1      | 0.0411 | 0.0971 | type IIa hypersensitivity                                    |
| 6012  | 2   | 0  | 1  | 1  | 1      | 0.0411 | 0.0971 | galactose metabolism                                         |
| 16880 | 2   | 0  | 1  | 1  | 1      | 0.0411 | 0.0971 | acid-ammonia (or amide) ligase activity                      |
| 4745  | 2   | 0  | 1  | 1  | 1      | 0.0411 | 0.0971 | retinol dehydrogenase activity                               |
| 16553 | 2   | 0  | 1  | 1  | 1      | 0.0411 | 0.0971 | base conversion or substitution editing                      |
| 16508 | 2   | 0  | 1  | 1  | 1      | 0.0411 | 0.0971 | long-chain-enoil-CoA hydratase activity                      |
| 4478  | 2   | 0  | 1  | 1  | 1      | 0.0411 | 0.0971 | methionine adenosyltransferase activity                      |
| 4465  | 2   | 0  | 1  | 1  | 1      | 0.0411 | 0.0971 | lipoprotein lipase activity                                  |
| 4461  | 2   | 0  | 1  | 1  | 1      | 0.0411 | 0.0971 | lactose synthase activity                                    |
| 4421  | 2   | 0  | 1  | 1  | 1      | 0.0411 | 0.0971 | hydroxymethylglutaryl-CoA synthase activity                  |
| 16316 | 2   | 0  | 1  | 1  | 1      | 0.0411 | 0.0971 | phosphatidylinositol-3,4-bisphosphate 4-phosphatase activity |
| 30548 | 2   | 0  | 1  | 1  | 1      | 0.0411 | 0.0971 | acetylcholine receptor regulator activity                    |
| 16211 | 2   | 0  | 1  | 1  | 1      | 0.0411 | 0.0971 | ammonia ligase activity                                      |
| 4234  | 2   | 0  | 1  | 1  | 1      | 0.0411 | 0.0971 | macrophage elastase activity                                 |
| 4128  | 2   | 0  | 1  | 1  | 1      | 0.0411 | 0.0971 | cytochrome-b5 reductase activity                             |
| 19864 | 2   | 0  | 1  | 1  | 1      | 0.0411 | 0.0971 | IgG binding                                                  |
| 19770 | 2   | 0  | 1  | 1  | 1      | 0.0411 | 0.0971 | IgG receptor activity                                        |
| 45995 | 2   | 0  | 1  | 1  | 1      | 0.0411 | 0.0971 | regulation of embryonic development                          |
| 45785 | 2   | 0  | 1  | 1  | 1      | 0.0411 | 0.0971 | positive regulation of cell adhesion                         |
| 5860  | 2   | 0  | 1  | 1  | 1      | 0.0411 | 0.0971 | non-muscle myosin                                            |
| 5010  | 2   | 0  | 1  | 1  | 1      | 0.0411 | 0.0971 | insulin-like growth factor receptor activity                 |
| 8934  | 2   | 0  | 1  | 1  | 1      | 0.0411 | 0.0971 | inositol-1(or 4)-monophosphatase activity                    |
| 48009 | 2   | 0  | 1  | 1  | 1      | 0.0411 | 0.0971 | insulin-like growth factor receptor signaling pathway        |
| 3969  | 2   | 0  | 1  | 1  | 1      | 0.0411 | 0.0971 | RNA editase activity                                         |
| 8670  | 2   | 0  | 1  | 1  | 1      | 0.0411 | 0.0971 | 2,4-dienoyl-CoA reductase (NADPH) activity                   |
| 3726  | 2   | 0  | 1  | 1  | 1      | 0.0411 | 0.0971 | double-stranded RNA adenosine deaminase activity             |
| 8157  | 2   | 0  | 1  | 1  | 1      | 0.0411 | 0.0971 | protein phosphatase 1 binding                                |
| 8132  | 2   | 0  | 1  | 1  | 1      | 0.0411 | 0.0971 | pancreatic elastase activity                                 |
| 9123  | 11  | 2  | 0  | 2  | 0.0386 | 1      | 0.1009 | nucleoside monophosphate metabolism                          |
| 3773  | 11  | 2  | 0  | 2  | 0.0386 | 1      | 0.1009 | heat shock protein activity                                  |
| 15718 | 11  | 1  | 1  | 2  | 0.2768 | 0.2065 | 0.1009 | monocarboxylic acid transport                                |
| 6810  | 907 | 36 | 17 | 53 | 0.0223 | 0.7266 | 0.1032 | transport                                                    |

|       |      |     |    |     |        |        |                                                                                        |
|-------|------|-----|----|-----|--------|--------|----------------------------------------------------------------------------------------|
| 7623  | 23   | 2   | 1  | 3   | 0.1423 | 0.3838 | 0.1036 circadian rhythm                                                                |
| 16616 | 51   | 2   | 3  | 5   | 0.4383 | 0.0885 | 0.1076 oxidoreductase activity, acting on the CH-OH group of donors, NAD or NADP as ac |
| 16564 | 37   | 3   | 1  | 4   | 0.0906 | 0.5417 | 0.1096 transcriptional repressor activity                                              |
| 7605  | 37   | 3   | 1  | 4   | 0.0906 | 0.5417 | 0.1096 perception of sound                                                             |
| 19838 | 37   | 2   | 2  | 4   | 0.2914 | 0.1787 | 0.1096 growth factor binding                                                           |
| 8150  | 3795 | 111 | 83 | 194 | 0.4542 | 0.0641 | 0.1123 biological_process                                                              |
| 5891  | 24   | 3   | 0  | 3   | 0.0309 | 1      | 0.1142 voltage-gated calcium channel complex                                           |
| 6956  | 24   | 2   | 1  | 3   | 0.1524 | 0.3967 | 0.1142 complement activation                                                           |
| 6959  | 67   | 2   | 4  | 6   | 0.5842 | 0.0495 | 0.1144 humoral immune response                                                         |
| 6469  | 12   | 2   | 0  | 2   | 0.0455 | 1      | 0.1172 negative regulation of protein kinase activity                                  |
| 5788  | 12   | 2   | 0  | 2   | 0.0455 | 1      | 0.1172 endoplasmic reticulum lumen                                                     |
| 8154  | 12   | 2   | 0  | 2   | 0.0455 | 1      | 0.1172 actin polymerization and/or depolymerization                                    |
| 6879  | 12   | 1   | 1  | 2   | 0.2978 | 0.223  | 0.1172 iron ion homeostasis                                                            |
| 45637 | 12   | 1   | 1  | 2   | 0.2978 | 0.223  | 0.1172 regulation of myeloid blood cell differentiation                                |
| 5178  | 12   | 1   | 1  | 2   | 0.2978 | 0.223  | 0.1172 integrin binding                                                                |
| 1763  | 12   | 0   | 2  | 2   | 1      | 0.0246 | 0.1172 branching morphogenesis                                                         |
| 4437  | 12   | 0   | 2  | 2   | 1      | 0.0246 | 0.1172 inositol or phosphatidylinositol phosphatase activity                           |
| 15674 | 83   | 6   | 1  | 7   | 0.0322 | 0.828  | 0.1173 di-, tri-valent inorganic cation transport                                      |
| 50954 | 38   | 3   | 1  | 4   | 0.0964 | 0.5513 | 0.118 sensory perception of mechanical stimulus                                        |
| 6800  | 53   | 1   | 4  | 5   | 0.7918 | 0.0235 | 0.1216 oxygen and reactive oxygen species metabolism                                   |
| 30163 | 218  | 10  | 5  | 15  | 0.0988 | 0.4772 | 0.1236 protein catabolism                                                              |
| 7178  | 39   | 3   | 1  | 4   | 0.1023 | 0.5608 | 0.1267 transmembrane receptor protein serine/threonine kinase signaling pathway        |
| 50982 | 39   | 3   | 1  | 4   | 0.1023 | 0.5608 | 0.1267 detection of mechanical stimulus                                                |
| 16049 | 69   | 5   | 1  | 6   | 0.0486 | 0.768  | 0.1269 cell growth                                                                     |
| 6731  | 69   | 2   | 4  | 6   | 0.6004 | 0.0541 | 0.1269 coenzyme and prosthetic group metabolism                                        |
| 16614 | 54   | 2   | 3  | 5   | 0.4678 | 0.1009 | 0.1289 oxidoreductase activity, acting on CH-OH group of donors                        |
| 8361  | 70   | 5   | 1  | 6   | 0.0511 | 0.7729 | 0.1334 regulation of cell size                                                         |
| 8629  | 13   | 2   | 0  | 2   | 0.0528 | 1      | 0.1342 induction of apoptosis by intracellular signals                                 |
| 30855 | 13   | 1   | 1  | 2   | 0.3182 | 0.2392 | 0.1342 epithelial cell differentiation                                                 |
| 8286  | 13   | 1   | 1  | 2   | 0.3182 | 0.2392 | 0.1342 insulin receptor signaling pathway                                              |
| 42995 | 40   | 2   | 2  | 4   | 0.3238 | 0.2014 | 0.1356 cell projection                                                                 |
| 5245  | 26   | 3   | 0  | 3   | 0.038  | 1      | 0.1367 voltage-gated calcium channel activity                                          |
| 16835 | 26   | 1   | 2  | 3   | 0.5357 | 0.1006 | 0.1367 carbon-oxygen lyase activity                                                    |
| 6930  | 3    | 1   | 0  | 1   | 0.0845 | 1      | 0.142 substrate-bound cell migration, cell extension                                   |
| 6656  | 3    | 1   | 0  | 1   | 0.0845 | 1      | 0.142 phosphatidylcholine biosynthesis                                                 |
| 6636  | 3    | 1   | 0  | 1   | 0.0845 | 1      | 0.142 fatty acid desaturation                                                          |
| 1649  | 3    | 1   | 0  | 1   | 0.0845 | 1      | 0.142 osteoblast differentiation                                                       |

|       |   |   |   |   |        |        |                                                                 |
|-------|---|---|---|---|--------|--------|-----------------------------------------------------------------|
| 16868 | 3 | 1 | 0 | 1 | 0.0845 | 1      | 0.142 intramolecular transferase activity, phosphotransferases  |
| 4862  | 3 | 1 | 0 | 1 | 0.0845 | 1      | 0.142 cAMP-dependent protein kinase inhibitor activity          |
| 16805 | 3 | 1 | 0 | 1 | 0.0845 | 1      | 0.142 dipeptidase activity                                      |
| 4660  | 3 | 1 | 0 | 1 | 0.0845 | 1      | 0.142 protein farnesyltransferase activity                      |
| 42775 | 3 | 1 | 0 | 1 | 0.0845 | 1      | 0.142 ATP synthesis coupled electron transport (sensu Eukarya)  |
| 42773 | 3 | 1 | 0 | 1 | 0.0845 | 1      | 0.142 ATP synthesis coupled electron transport                  |
| 4293  | 3 | 1 | 0 | 1 | 0.0845 | 1      | 0.142 tissue kallikrein activity                                |
| 4287  | 3 | 1 | 0 | 1 | 0.0845 | 1      | 0.142 prolyl oligopeptidase activity                            |
| 30502 | 3 | 1 | 0 | 1 | 0.0845 | 1      | 0.142 negative regulation of bone mineralization                |
| 4047  | 3 | 1 | 0 | 1 | 0.0845 | 1      | 0.142 aminomethyltransferase activity                           |
| 30162 | 3 | 1 | 0 | 1 | 0.0845 | 1      | 0.142 regulation of proteolysis and peptidolysis                |
| 30032 | 3 | 1 | 0 | 1 | 0.0845 | 1      | 0.142 lamellipodium biogenesis                                  |
| 5546  | 3 | 1 | 0 | 1 | 0.0845 | 1      | 0.142 phosphatidylinositol-4,5-bisphosphate binding             |
| 5381  | 3 | 1 | 0 | 1 | 0.0845 | 1      | 0.142 iron ion transporter activity                             |
| 8883  | 3 | 1 | 0 | 1 | 0.0845 | 1      | 0.142 glutamyl-tRNA reductase activity                          |
| 3708  | 3 | 1 | 0 | 1 | 0.0845 | 1      | 0.142 retinoic acid receptor activity                           |
| 46626 | 3 | 1 | 0 | 1 | 0.0845 | 1      | 0.142 regulation of insulin receptor signaling pathway          |
| 15272 | 3 | 1 | 0 | 1 | 0.0845 | 1      | 0.142 ATP-activated inward rectifier potassium channel activity |
| 6090  | 3 | 0 | 1 | 1 | 1      | 0.0611 | 0.142 pyruvate metabolism                                       |
| 6086  | 3 | 0 | 1 | 1 | 1      | 0.0611 | 0.142 acetyl-CoA biosynthesis from pyruvate                     |
| 9954  | 3 | 0 | 1 | 1 | 1      | 0.0611 | 0.142 proximal/distal pattern formation                         |
| 9925  | 3 | 0 | 1 | 1 | 1      | 0.0611 | 0.142 basal plasma membrane                                     |
| 4939  | 3 | 0 | 1 | 1 | 1      | 0.0611 | 0.142 beta-adrenergic receptor activity                         |
| 16803 | 3 | 0 | 1 | 1 | 1      | 0.0611 | 0.142 ether hydrolase activity                                  |
| 4740  | 3 | 0 | 1 | 1 | 1      | 0.0611 | 0.142 [pyruvate dehydrogenase (lipoamide)] kinase activity      |
| 51020 | 3 | 0 | 1 | 1 | 1      | 0.0611 | 0.142 GTPase binding                                            |
| 9312  | 3 | 0 | 1 | 1 | 1      | 0.0611 | 0.142 oligosaccharide biosynthesis                              |
| 42708 | 3 | 0 | 1 | 1 | 1      | 0.0611 | 0.142 elastase activity                                         |
| 4463  | 3 | 0 | 1 | 1 | 1      | 0.0611 | 0.142 leukotriene-A4 hydrolase activity                         |
| 16312 | 3 | 0 | 1 | 1 | 1      | 0.0611 | 0.142 inositol bisphosphate phosphatase activity                |
| 4332  | 3 | 0 | 1 | 1 | 1      | 0.0611 | 0.142 fructose-bisphosphate aldolase activity                   |
| 4301  | 3 | 0 | 1 | 1 | 1      | 0.0611 | 0.142 epoxide hydrolase activity                                |
| 4000  | 3 | 0 | 1 | 1 | 1      | 0.0611 | 0.142 adenosine deaminase activity                              |
| 30238 | 3 | 0 | 1 | 1 | 1      | 0.0611 | 0.142 male sex determination                                    |
| 19763 | 3 | 0 | 1 | 1 | 1      | 0.0611 | 0.142 immunoglobulin receptor activity                          |
| 45213 | 3 | 0 | 1 | 1 | 1      | 0.0611 | 0.142 neurotransmitter receptor metabolism                      |
| 5902  | 3 | 0 | 1 | 1 | 1      | 0.0611 | 0.142 microvillus                                               |

|       |      |    |    |    |        |        |                                                            |
|-------|------|----|----|----|--------|--------|------------------------------------------------------------|
| 5697  | 3    | 0  | 1  | 1  | 1      | 0.0611 | 0.142 telomerase holoenzyme complex                        |
| 5606  | 3    | 0  | 1  | 1  | 1      | 0.0611 | 0.142 laminin-1                                            |
| 3988  | 3    | 0  | 1  | 1  | 1      | 0.0611 | 0.142 acetyl-CoA C-acyltransferase activity                |
| 43027 | 3    | 0  | 1  | 1  | 1      | 0.0611 | 0.142 caspase inhibitor activity                           |
| 3720  | 3    | 0  | 1  | 1  | 1      | 0.0611 | 0.142 telomerase activity                                  |
| 15321 | 3    | 0  | 1  | 1  | 1      | 0.0611 | 0.142 sodium-dependent phosphate transporter activity      |
| 15302 | 3    | 0  | 1  | 1  | 1      | 0.0611 | 0.142 uncoupling protein activity                          |
| 46339 | 3    | 0  | 1  | 1  | 1      | 0.0611 | 0.142 diacylglycerol metabolism                            |
| 15980 | 88   | 5  | 2  | 7  | 0.1106 | 0.5507 | 0.1465 energy derivation by oxidation of organic compounds |
| 6112  | 27   | 3  | 0  | 3  | 0.0419 | 1      | 0.1485 energy reserve metabolism                           |
| 7622  | 27   | 2  | 1  | 3  | 0.1836 | 0.4338 | 0.1485 rhythmic behavior                                   |
| 6730  | 14   | 1  | 1  | 2  | 0.338  | 0.255  | 0.1516 one-carbon compound metabolism                      |
| 4364  | 14   | 0  | 2  | 2  | 1      | 0.033  | 0.1516 glutathione transferase activity                    |
| 6732  | 57   | 1  | 4  | 5  | 0.8152 | 0.0298 | 0.152 coenzyme metabolism                                  |
| 40008 | 73   | 4  | 2  | 6  | 0.1604 | 0.4511 | 0.1538 regulation of growth                                |
| 43170 | 1149 | 44 | 20 | 64 | 0.0194 | 0.8571 | 0.1568 macromolecule metabolism                            |
| 1558  | 58   | 4  | 1  | 5  | 0.0862 | 0.7066 | 0.1601 regulation of cell growth                           |
| 9260  | 28   | 3  | 0  | 3  | 0.046  | 1      | 0.1606 ribonucleotide biosynthesis                         |
| 6096  | 28   | 2  | 1  | 3  | 0.1941 | 0.4456 | 0.1606 glycolysis                                          |
| 5319  | 28   | 1  | 2  | 3  | 0.5624 | 0.114  | 0.1606 lipid transporter activity                          |
| 16310 | 282  | 14 | 4  | 18 | 0.0321 | 0.8481 | 0.1621 phosphorylation                                     |
| 5262  | 43   | 4  | 0  | 4  | 0.0347 | 1      | 0.1638 calcium channel activity                            |
| 16298 | 43   | 3  | 1  | 4  | 0.1274 | 0.5965 | 0.1638 lipase activity                                     |
| 16064 | 43   | 1  | 3  | 4  | 0.7196 | 0.0589 | 0.1638 humoral defense mechanism (sensu Vertebrata)        |
| 6508  | 212  | 9  | 5  | 14 | 0.1598 | 0.4525 | 0.168 proteolysis and peptidolysis                         |
| 16789 | 59   | 4  | 1  | 5  | 0.0905 | 0.7128 | 0.1683 carboxylic ester hydrolase activity                 |
| 6006  | 59   | 3  | 2  | 5  | 0.2438 | 0.3481 | 0.1683 glucose metabolism                                  |
| 6958  | 15   | 1  | 1  | 2  | 0.3573 | 0.2706 | 0.1695 complement activation, classical pathway            |
| 16831 | 15   | 1  | 1  | 2  | 0.3573 | 0.2706 | 0.1695 carboxy-lyase activity                              |
| 50776 | 15   | 1  | 1  | 2  | 0.3573 | 0.2706 | 0.1695 regulation of immune response                       |
| 46915 | 15   | 1  | 1  | 2  | 0.3573 | 0.2706 | 0.1695 transition metal ion transporter activity           |
| 9636  | 15   | 0  | 2  | 2  | 1      | 0.0376 | 0.1695 response to toxin                                   |
| 5576  | 1059 | 40 | 19 | 59 | 0.0334 | 0.808  | 0.171 extracellular                                        |
| 4867  | 29   | 2  | 1  | 3  | 0.2048 | 0.4572 | 0.1729 serine-type endopeptidase inhibitor activity        |
| 51094 | 29   | 2  | 1  | 3  | 0.2048 | 0.4572 | 0.1729 positive regulation of development                  |
| 9986  | 44   | 3  | 1  | 4  | 0.1339 | 0.605  | 0.1736 cell surface                                        |
| 4263  | 44   | 3  | 1  | 4  | 0.1339 | 0.605  | 0.1736 chymotrypsin activity                               |

|       |     |    |   |    |        |        |        |                                                                                   |
|-------|-----|----|---|----|--------|--------|--------|-----------------------------------------------------------------------------------|
| 5783  | 196 | 7  | 6 | 13 | 0.3407 | 0.221  | 0.1755 | endoplasmic reticulum                                                             |
| 6812  | 250 | 13 | 3 | 16 | 0.0276 | 0.9005 | 0.1774 | cation transport                                                                  |
| 16477 | 93  | 5  | 2 | 7  | 0.1314 | 0.581  | 0.1788 | cell migration                                                                    |
| 9628  | 215 | 6  | 8 | 14 | 0.5989 | 0.0763 | 0.181  | response to abiotic stimulus                                                      |
| 7517  | 77  | 4  | 2 | 6  | 0.1833 | 0.4788 | 0.183  | muscle development                                                                |
| 4295  | 45  | 3  | 1 | 4  | 0.1406 | 0.6132 | 0.1836 | trypsin activity                                                                  |
| 6544  | 4   | 1  | 0 | 1  | 0.1111 | 1      | 0.1848 | glycine metabolism                                                                |
| 16866 | 4   | 1  | 0 | 1  | 0.1111 | 1      | 0.1848 | intramolecular transferase activity                                               |
| 4865  | 4   | 1  | 0 | 1  | 0.1111 | 1      | 0.1848 | type 1 serine/threonine specific protein phosphatase inhibitor activity           |
| 9649  | 4   | 1  | 0 | 1  | 0.1111 | 1      | 0.1848 | entrainment of circadian clock                                                    |
| 16778 | 4   | 1  | 0 | 1  | 0.1111 | 1      | 0.1848 | diphosphotransferase activity                                                     |
| 4749  | 4   | 1  | 0 | 1  | 0.1111 | 1      | 0.1848 | ribose-phosphate diphosphokinase activity                                         |
| 4708  | 4   | 1  | 0 | 1  | 0.1111 | 1      | 0.1848 | MAP kinase kinase activity                                                        |
| 51017 | 4   | 1  | 0 | 1  | 0.1111 | 1      | 0.1848 | actin filament bundle formation                                                   |
| 4396  | 4   | 1  | 0 | 1  | 0.1111 | 1      | 0.1848 | hexokinase activity                                                               |
| 30514 | 4   | 1  | 0 | 1  | 0.1111 | 1      | 0.1848 | negative regulation of BMP signaling pathway                                      |
| 30512 | 4   | 1  | 0 | 1  | 0.1111 | 1      | 0.1848 | negative regulation of transforming growth factor beta receptor signaling pathway |
| 30510 | 4   | 1  | 0 | 1  | 0.1111 | 1      | 0.1848 | regulation of BMP signaling pathway                                               |
| 4245  | 4   | 1  | 0 | 1  | 0.1111 | 1      | 0.1848 | nepriylsin activity                                                               |
| 30279 | 4   | 1  | 0 | 1  | 0.1111 | 1      | 0.1848 | negative regulation of ossification                                               |
| 19841 | 4   | 1  | 0 | 1  | 0.1111 | 1      | 0.1848 | retinol binding                                                                   |
| 30169 | 4   | 1  | 0 | 1  | 0.1111 | 1      | 0.1848 | low-density lipoprotein binding                                                   |
| 45446 | 4   | 1  | 0 | 1  | 0.1111 | 1      | 0.1848 | endothelial cell differentiation                                                  |
| 5954  | 4   | 1  | 0 | 1  | 0.1111 | 1      | 0.1848 | calcium- and calmodulin-dependent protein kinase complex                          |
| 50678 | 4   | 1  | 0 | 1  | 0.1111 | 1      | 0.1848 | regulation of epithelial cell proliferation                                       |
| 17158 | 4   | 1  | 0 | 1  | 0.1111 | 1      | 0.1848 | regulation of calcium ion-dependent exocytosis                                    |
| 5041  | 4   | 1  | 0 | 1  | 0.1111 | 1      | 0.1848 | low-density lipoprotein receptor activity                                         |
| 98    | 4   | 1  | 0 | 1  | 0.1111 | 1      | 0.1848 | sulfur amino acid catabolism                                                      |
| 80    | 4   | 1  | 0 | 1  | 0.1111 | 1      | 0.1848 | G1 phase of mitotic cell cycle                                                    |
| 46470 | 4   | 1  | 0 | 1  | 0.1111 | 1      | 0.1848 | phosphatidylcholine metabolism                                                    |
| 6878  | 4   | 0  | 1 | 1  | 1      | 0.0806 | 0.1848 | copper ion homeostasis                                                            |
| 1569  | 4   | 0  | 1 | 1  | 1      | 0.0806 | 0.1848 | patterning of blood vessels                                                       |
| 6085  | 4   | 0  | 1 | 1  | 1      | 0.0806 | 0.1848 | acetyl-CoA biosynthesis                                                           |
| 16934 | 4   | 0  | 1 | 1  | 1      | 0.0806 | 0.1848 | glycine-gated chloride channel activity                                           |
| 4891  | 4   | 0  | 1 | 1  | 1      | 0.0806 | 0.1848 | glycine-inhibited chloride channel activity                                       |
| 16832 | 4   | 0  | 1 | 1  | 1      | 0.0806 | 0.1848 | aldehyde-lyase activity                                                           |
| 16801 | 4   | 0  | 1 | 1  | 1      | 0.0806 | 0.1848 | hydrolase activity, acting on ether bonds                                         |

|       |     |    |   |    |        |        |                                                                                                 |
|-------|-----|----|---|----|--------|--------|-------------------------------------------------------------------------------------------------|
| 16547 | 4   | 0  | 1 | 1  | 1      | 0.0806 | 0.1848 RNA editing                                                                              |
| 16453 | 4   | 0  | 1 | 1  | 1      | 0.0806 | 0.1848 C-acetyltransferase activity                                                             |
| 30545 | 4   | 0  | 1 | 1  | 1      | 0.0806 | 0.1848 receptor regulator activity                                                              |
| 45884 | 4   | 0  | 1 | 1  | 1      | 0.0806 | 0.1848 regulation of survival gene product activity                                             |
| 19413 | 4   | 0  | 1 | 1  | 1      | 0.0806 | 0.1848 acetate biosynthesis                                                                     |
| 7223  | 4   | 0  | 1 | 1  | 1      | 0.0806 | 0.1848 frizzled-2 signaling pathway                                                             |
| 45123 | 4   | 0  | 1 | 1  | 1      | 0.0806 | 0.1848 cellular extravasation                                                                   |
| 5639  | 4   | 0  | 1 | 1  | 1      | 0.0806 | 0.1848 integral to nuclear inner membrane                                                       |
| 781   | 4   | 0  | 1 | 1  | 1      | 0.0806 | 0.1848 chromosome, telomeric region                                                             |
| 303   | 4   | 0  | 1 | 1  | 1      | 0.0806 | 0.1848 response to superoxide                                                                   |
| 3985  | 4   | 0  | 1 | 1  | 1      | 0.0806 | 0.1848 acetyl-CoA C-acetyltransferase activity                                                  |
| 3964  | 4   | 0  | 1 | 1  | 1      | 0.0806 | 0.1848 RNA-directed DNA polymerase activity                                                     |
| 43112 | 4   | 0  | 1 | 1  | 1      | 0.0806 | 0.1848 receptor metabolism                                                                      |
| 15909 | 4   | 0  | 1 | 1  | 1      | 0.0806 | 0.1848 long-chain fatty acid transport                                                          |
| 46912 | 4   | 0  | 1 | 1  | 1      | 0.0806 | 0.1848 transferase activity, transferring acyl groups, acyl groups converted into alkyl on trar |
| 8634  | 4   | 0  | 1 | 1  | 1      | 0.0806 | 0.1848 negative regulation of survival gene product activity                                    |
| 6816  | 61  | 5  | 0 | 5  | 0.0308 | 1      | 0.1852 calcium ion transport                                                                    |
| 5244  | 111 | 8  | 0 | 8  | 0.0144 | 1      | 0.1862 voltage-gated ion channel activity                                                       |
| 6119  | 16  | 2  | 0 | 2  | 0.0768 | 1      | 0.1877 oxidative phosphorylation                                                                |
| 16790 | 16  | 2  | 0 | 2  | 0.0768 | 1      | 0.1877 thiolester hydrolase activity                                                            |
| 9069  | 16  | 2  | 0 | 2  | 0.0768 | 1      | 0.1877 serine family amino acid metabolism                                                      |
| 19200 | 16  | 2  | 0 | 2  | 0.0768 | 1      | 0.1877 carbohydrate kinase activity                                                             |
| 7585  | 16  | 1  | 1 | 2  | 0.376  | 0.2858 | 0.1877 respiratory gaseous exchange                                                             |
| 46916 | 16  | 1  | 1 | 2  | 0.376  | 0.2858 | 0.1877 transition metal ion homeostasis                                                         |
| 16684 | 16  | 0  | 2 | 2  | 1      | 0.0424 | 0.1877 oxidoreductase activity, acting on peroxide as acceptor                                  |
| 4601  | 16  | 0  | 2 | 2  | 1      | 0.0424 | 0.1877 peroxidase activity                                                                      |
| 5839  | 16  | 0  | 2 | 2  | 1      | 0.0424 | 0.1877 proteasome core complex (sensu Eukarya)                                                  |
| 5516  | 78  | 3  | 3 | 6  | 0.3953 | 0.2199 | 0.1906 calmodulin binding                                                                       |
| 45859 | 46  | 4  | 0 | 4  | 0.043  | 1      | 0.1939 regulation of protein kinase activity                                                    |
| 15405 | 46  | 3  | 1 | 4  | 0.1475 | 0.6214 | 0.1939 P-P-bond-hydrolysis-driven transporter activity                                          |
| 42803 | 31  | 2  | 1 | 3  | 0.2263 | 0.4797 | 0.1984 protein homodimerization activity                                                        |
| 8238  | 31  | 2  | 1 | 3  | 0.2263 | 0.4797 | 0.1984 exopeptidase activity                                                                    |
| 30001 | 219 | 12 | 2 | 14 | 0.0237 | 0.9476 | 0.1991 metal ion transport                                                                      |
| 6796  | 329 | 14 | 6 | 20 | 0.0921 | 0.6906 | 0.2013 phosphate metabolism                                                                     |
| 6793  | 329 | 14 | 6 | 20 | 0.0921 | 0.6906 | 0.2013 phosphorus metabolism                                                                    |
| 15399 | 63  | 4  | 1 | 5  | 0.1087 | 0.7363 | 0.2028 primary active transporter activity                                                      |
| 1666  | 17  | 1  | 1 | 2  | 0.3942 | 0.3007 | 0.2062 response to hypoxia                                                                      |

|       |     |   |   |    |        |        |        |                                                                                       |
|-------|-----|---|---|----|--------|--------|--------|---------------------------------------------------------------------------------------|
| 4177  | 17  | 1 | 1 | 2  | 0.3942 | 0.3007 | 0.2062 | aminopeptidase activity                                                               |
| 9259  | 32  | 3 | 0 | 3  | 0.0641 | 1      | 0.2115 | ribonucleotide metabolism                                                             |
| 6007  | 32  | 2 | 1 | 3  | 0.2371 | 0.4906 | 0.2115 | glucose catabolism                                                                    |
| 51082 | 32  | 2 | 1 | 3  | 0.2371 | 0.4906 | 0.2115 | unfolded protein binding                                                              |
| 16055 | 32  | 1 | 2 | 3  | 0.6113 | 0.142  | 0.2115 | Wnt receptor signaling pathway                                                        |
| 8324  | 98  | 5 | 2 | 7  | 0.1538 | 0.6099 | 0.2139 | cation transporter activity                                                           |
| 4674  | 188 | 9 | 3 | 12 | 0.0934 | 0.7576 | 0.2243 | protein serine/threonine kinase activity                                              |
| 46873 | 33  | 2 | 1 | 3  | 0.248  | 0.5012 | 0.2247 | metal ion transporter activity                                                        |
| 15662 | 33  | 2 | 1 | 3  | 0.248  | 0.5012 | 0.2247 | ATPase activity, coupled to transmembrane movement of ions, phosphorylative mec       |
| 5759  | 33  | 1 | 2 | 3  | 0.6227 | 0.1492 | 0.2247 | mitochondrial matrix                                                                  |
| 6986  | 18  | 2 | 0 | 2  | 0.0943 | 1      | 0.2248 | response to unfolded protein                                                          |
| 6941  | 18  | 1 | 1 | 2  | 0.4118 | 0.3153 | 0.2248 | striated muscle contraction                                                           |
| 1726  | 5   | 1 | 0 | 1  | 0.1369 | 1      | 0.2254 | ruffles                                                                               |
| 16909 | 5   | 1 | 0 | 1  | 0.1369 | 1      | 0.2254 | SAP kinase activity                                                                   |
| 16894 | 5   | 1 | 0 | 1  | 0.1369 | 1      | 0.2254 | endonuclease activity, active with either ribo- or deoxyribonucleic acids and produci |
| 16806 | 5   | 1 | 0 | 1  | 0.1369 | 1      | 0.2254 | dipeptidyl-peptidase and tripeptidyl-peptidase activity                               |
| 30856 | 5   | 1 | 0 | 1  | 0.1369 | 1      | 0.2254 | regulation of epithelial cell differentiation                                         |
| 16529 | 5   | 1 | 0 | 1  | 0.1369 | 1      | 0.2254 | sarcoplasmic reticulum                                                                |
| 16528 | 5   | 1 | 0 | 1  | 0.1369 | 1      | 0.2254 | sarcoplasm                                                                            |
| 4521  | 5   | 1 | 0 | 1  | 0.1369 | 1      | 0.2254 | endoribonuclease activity                                                             |
| 4221  | 5   | 1 | 0 | 1  | 0.1369 | 1      | 0.2254 | ubiquitin thiolesterase activity                                                      |
| 30449 | 5   | 1 | 0 | 1  | 0.1369 | 1      | 0.2254 | regulation of complement activation                                                   |
| 42391 | 5   | 1 | 0 | 1  | 0.1369 | 1      | 0.2254 | regulation of membrane potential                                                      |
| 4024  | 5   | 1 | 0 | 1  | 0.1369 | 1      | 0.2254 | alcohol dehydrogenase activity, zinc-dependent                                        |
| 4022  | 5   | 1 | 0 | 1  | 0.1369 | 1      | 0.2254 | alcohol dehydrogenase activity                                                        |
| 30228 | 5   | 1 | 0 | 1  | 0.1369 | 1      | 0.2254 | lipoprotein receptor activity                                                         |
| 30199 | 5   | 1 | 0 | 1  | 0.1369 | 1      | 0.2254 | collagen fibril organization                                                          |
| 30178 | 5   | 1 | 0 | 1  | 0.1369 | 1      | 0.2254 | negative regulation of Wnt receptor signaling pathway                                 |
| 42102 | 5   | 1 | 0 | 1  | 0.1369 | 1      | 0.2254 | positive regulation of T-cell proliferation                                           |
| 5761  | 5   | 1 | 0 | 1  | 0.1369 | 1      | 0.2254 | mitochondrial ribosome                                                                |
| 5744  | 5   | 1 | 0 | 1  | 0.1369 | 1      | 0.2254 | mitochondrial inner membrane presequence translocase complex                          |
| 50769 | 5   | 1 | 0 | 1  | 0.1369 | 1      | 0.2254 | positive regulation of neurogenesis                                                   |
| 50673 | 5   | 1 | 0 | 1  | 0.1369 | 1      | 0.2254 | epithelial cell proliferation                                                         |
| 313   | 5   | 1 | 0 | 1  | 0.1369 | 1      | 0.2254 | organellar ribosome                                                                   |
| 17015 | 5   | 1 | 0 | 1  | 0.1369 | 1      | 0.2254 | regulation of transforming growth factor beta receptor signaling pathway              |
| 15802 | 5   | 1 | 0 | 1  | 0.1369 | 1      | 0.2254 | basic amino acid transport                                                            |
| 15800 | 5   | 1 | 0 | 1  | 0.1369 | 1      | 0.2254 | acidic amino acid transport                                                           |
