# Supplementary material
Source: PubMed Central journal article supplement (PMC3902176)
Supplement: NIHMS10339-supplement-Supplemental_Heatmaps.pdf [file NIHMS10339-supplement-Supplemental_Heatmaps.pdf]

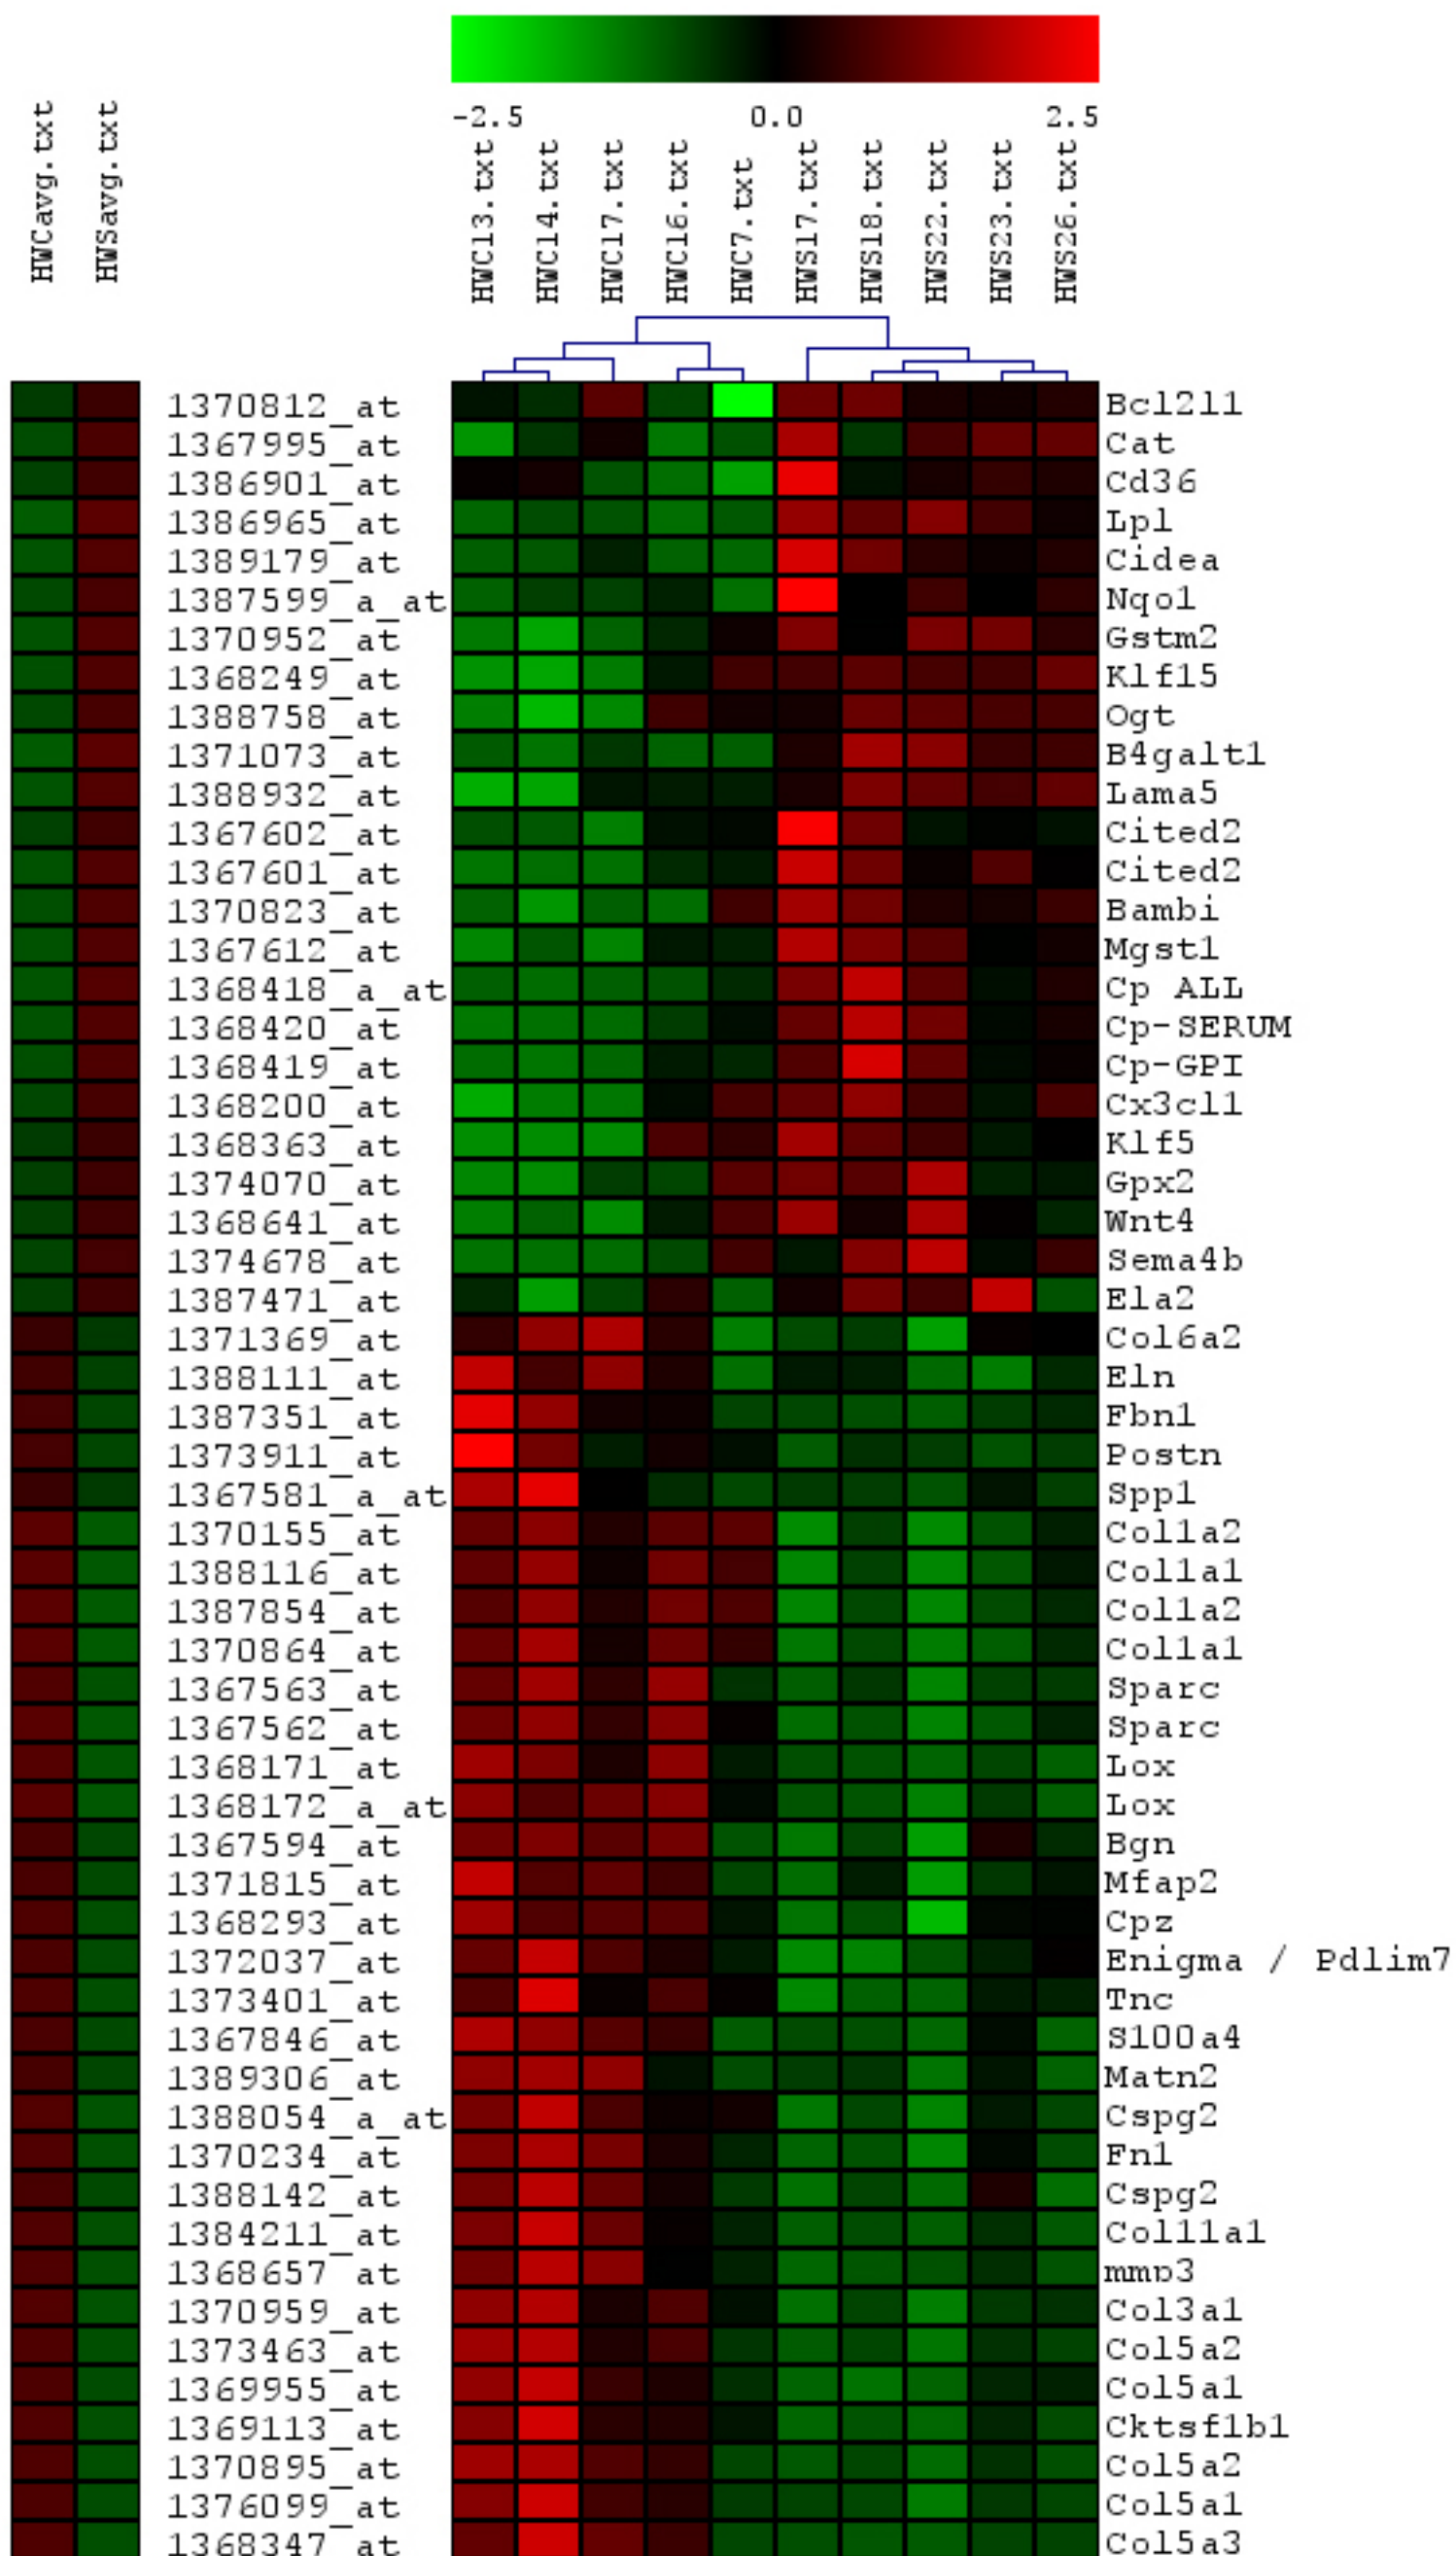

**Supplemental Display of Array Data: TIGR MeV 3.1 software based hierarchical clustering of all control (HWC) and diabetic (HWS) samples using expression values (from the Affymetrix CHP files) for those genes considered significant. The above heat map displays those genes included in Tables 1 and 2. The included CHP values for each gene/row were normalized using MeV for display purposes. Thus, each CHP expression value was adjusted using the mean and the standard deviation of the row of the matrix to which the value belongs, using the following formula:**

$$\text{value} = \frac{[(\text{value}) - \text{mean}(\text{gene})]}{[\text{standard deviation}(\text{gene})]}$$



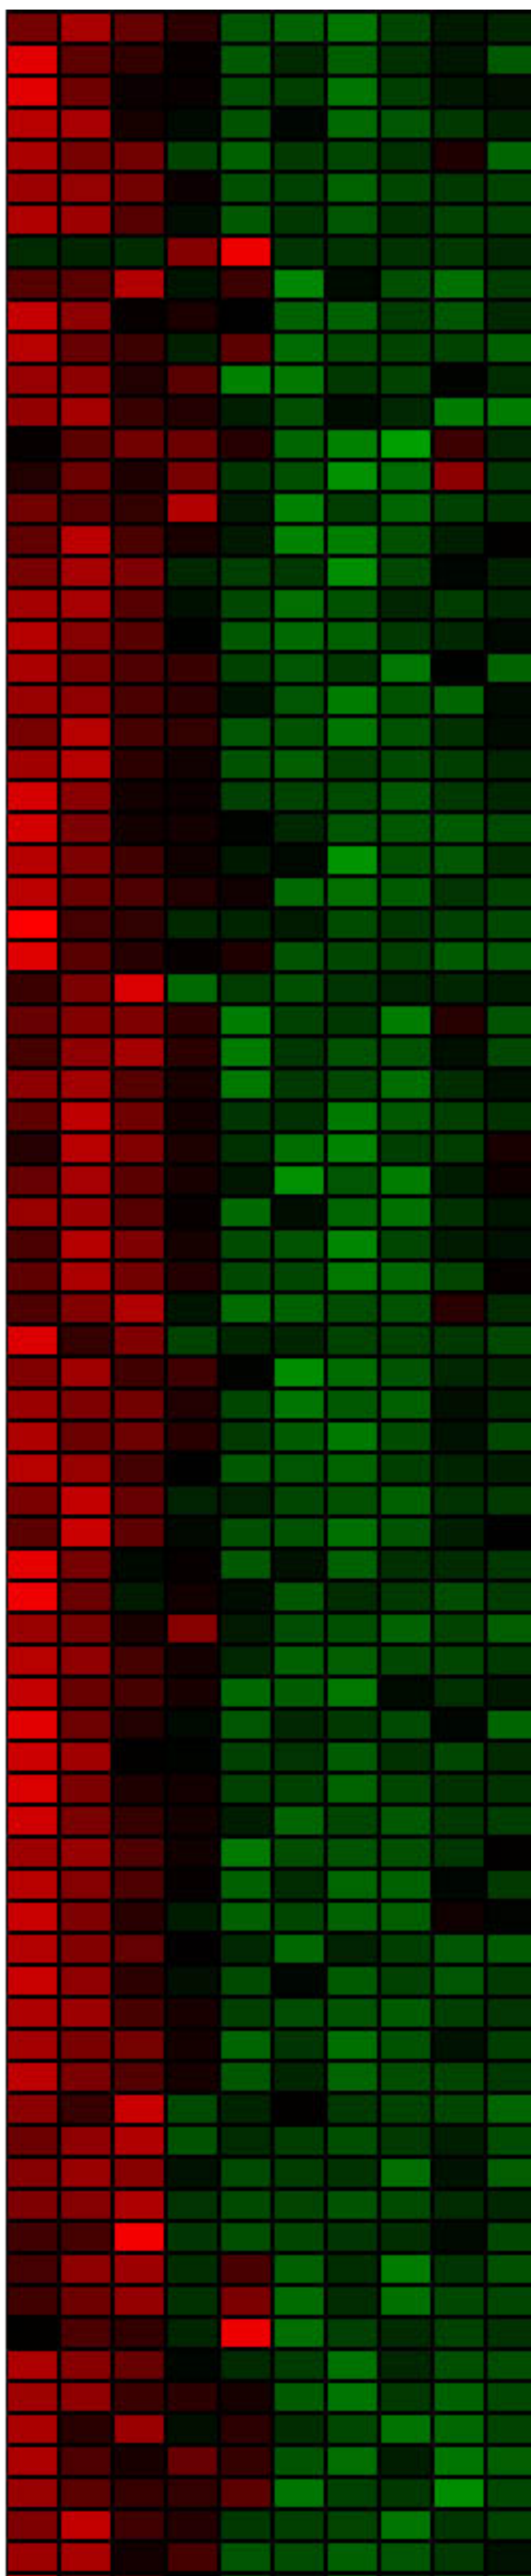

1388451\_at  
1371475\_at  
1389079\_at  
1377275\_at  
1376645\_at  
1389367\_at  
1387398\_at  
1388426\_at  
1371922\_at  
1388853\_at  
1370062\_at  
1370873\_at  
1368202\_a\_at  
1372159\_at  
1374012\_at  
1370847\_at  
1372037\_at  
1373684\_at  
1372085\_at  
1387698\_at  
1386884\_at  
1371255\_at  
1388387\_at  
1371310\_s\_at  
1387351\_at  
1389288\_at  
1387019\_at  
1375186\_at  
1398926\_at  
1389126\_at  
1372524\_at  
1386903\_at  
1372440\_at  
1372158\_at  
1368965\_at  
1390210\_at  
1369638\_at  
1370304\_at  
1389673\_at  
1388881\_at  
1368128\_at  
1383058\_at  
1386960\_at  
1368237\_at  
1391007\_s\_at  
1386968\_at  
1371000\_at  
1374017\_at  
1389033\_at  
1373911\_at  
1368171\_at  
1372858\_at  
1370738\_a\_at  
1371691\_at  
1372209\_at  
1372177\_at  
1387244\_at  
1390647\_at  
1376170\_at  
1368821\_at  
1368273\_at  
1389338\_at  
1370981\_at  
1374591\_at  
1389665\_at  
1387036\_at  
1369415\_at  
1389306\_at  
1389047\_at  
1389127\_at  
1392534\_at  
1389809\_at  
1370163\_at  
1389296\_at  
1368566\_a\_at  
1371421\_at  
1373064\_at  
1383052\_a\_at  
1376099\_at  
1375368\_at

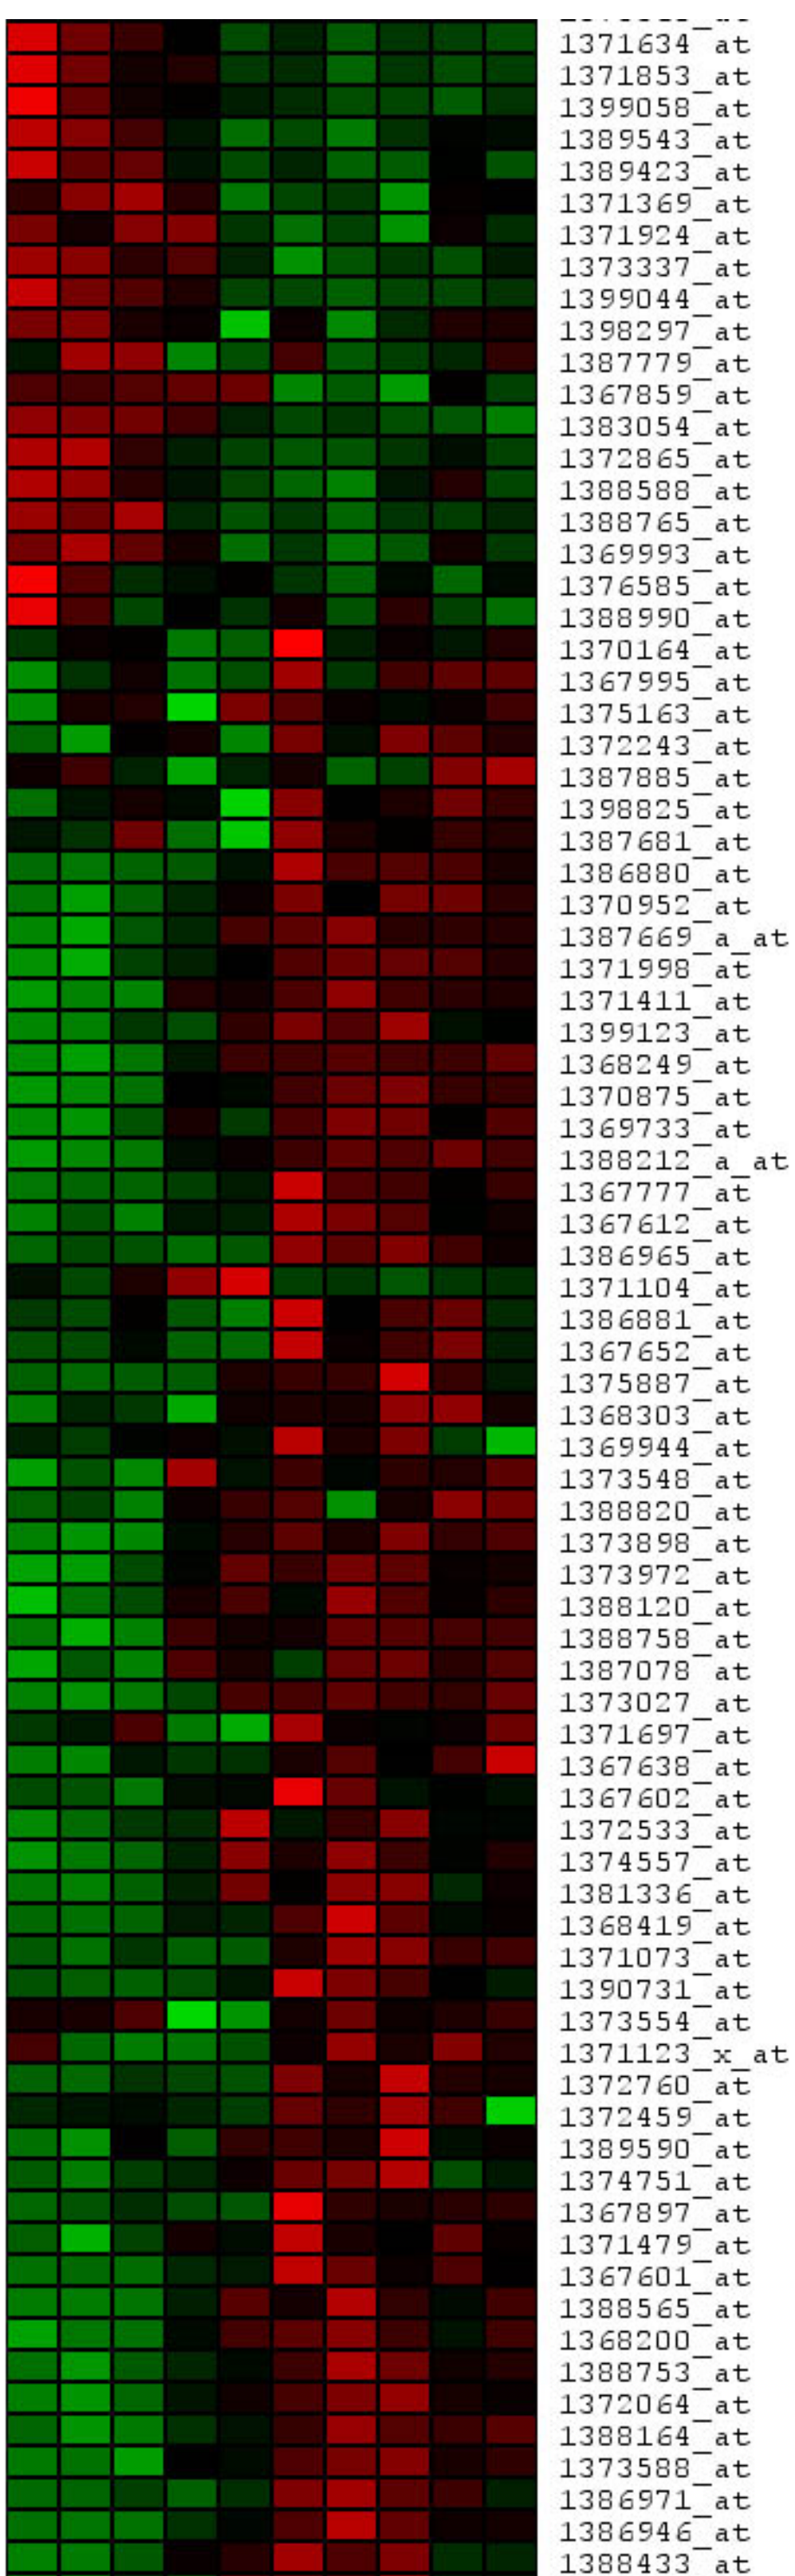

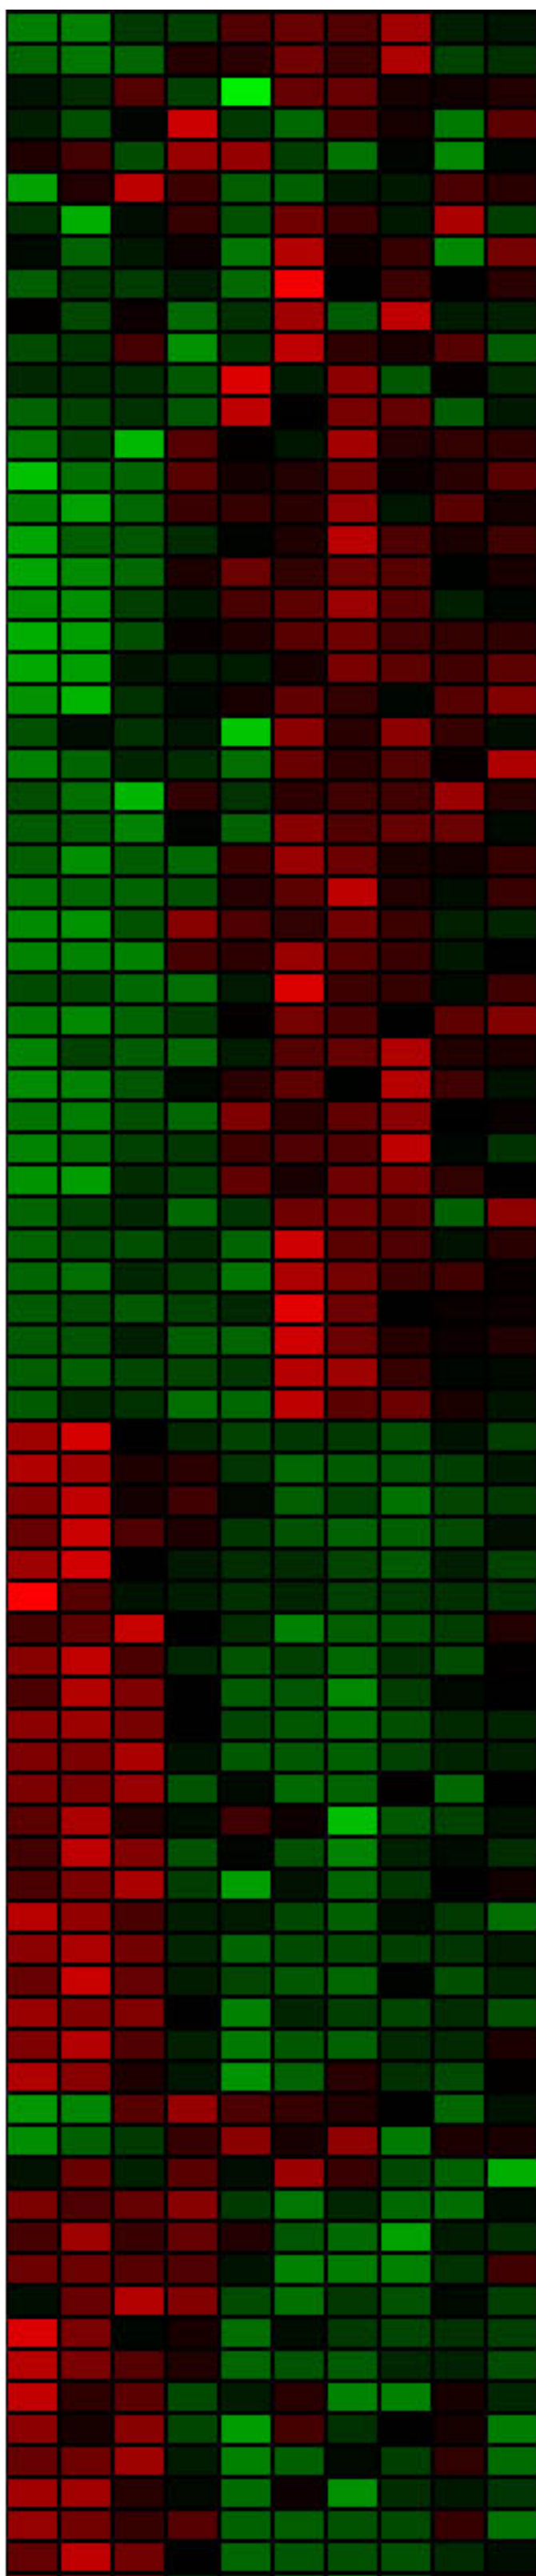

1374070 \_at  
1391509 \_at  
1370812 \_at  
1372798 \_at  
1390200 \_at  
1399104 \_at  
1388836 \_at  
1371882 \_a\_at  
1387599 \_a\_at  
1389686 \_at  
1387122 \_at  
1383322 \_at  
1383306 \_at  
1375958 \_at  
1376022 \_at  
1389787 \_at  
1367836 \_at  
1367767 \_at  
1372744 \_at  
1399109 \_at  
1388932 \_at  
1368123 \_at  
1372146 \_at  
1376156 \_at  
1388213 \_a\_at  
1372692 \_at  
1370823 \_at  
1390671 \_at  
1370307 \_at  
1368363 \_at  
1398249 \_at  
1367786 \_at  
1377049 \_at  
1372539 \_at  
1372824 \_at  
1374137 \_at  
1374976 \_a\_at  
1370966 \_at  
1388908 \_at  
1376709 \_at  
1389251 \_at  
1389179 \_at  
1386701 \_at  
1388924 \_at  
1367581 \_a\_at  
1387966 \_at  
1372006 \_at  
1389185 \_at  
1367863 \_at  
1388943 \_at  
1369798 \_at  
1377004 \_at  
1369560 \_at  
1369249 \_at  
1369782 \_a\_at  
1388491 \_at  
1390766 \_at  
1369357 \_at  
1368165 \_at  
1383053 \_x\_at  
1371591 \_at  
1398251 \_a\_at  
1388485 \_at  
1369732 \_a\_at  
1372918 \_at  
1373738 \_at  
1373288 \_at  
1389010 \_at  
1373482 \_at  
1390174 \_at  
1373510 \_at  
1370072 \_at  
1388497 \_at  
1389390 \_at  
1373967 \_at  
1376285 \_at  
1388425 \_at  
1368318 \_at  
1389021 \_at  
1372638 \_at

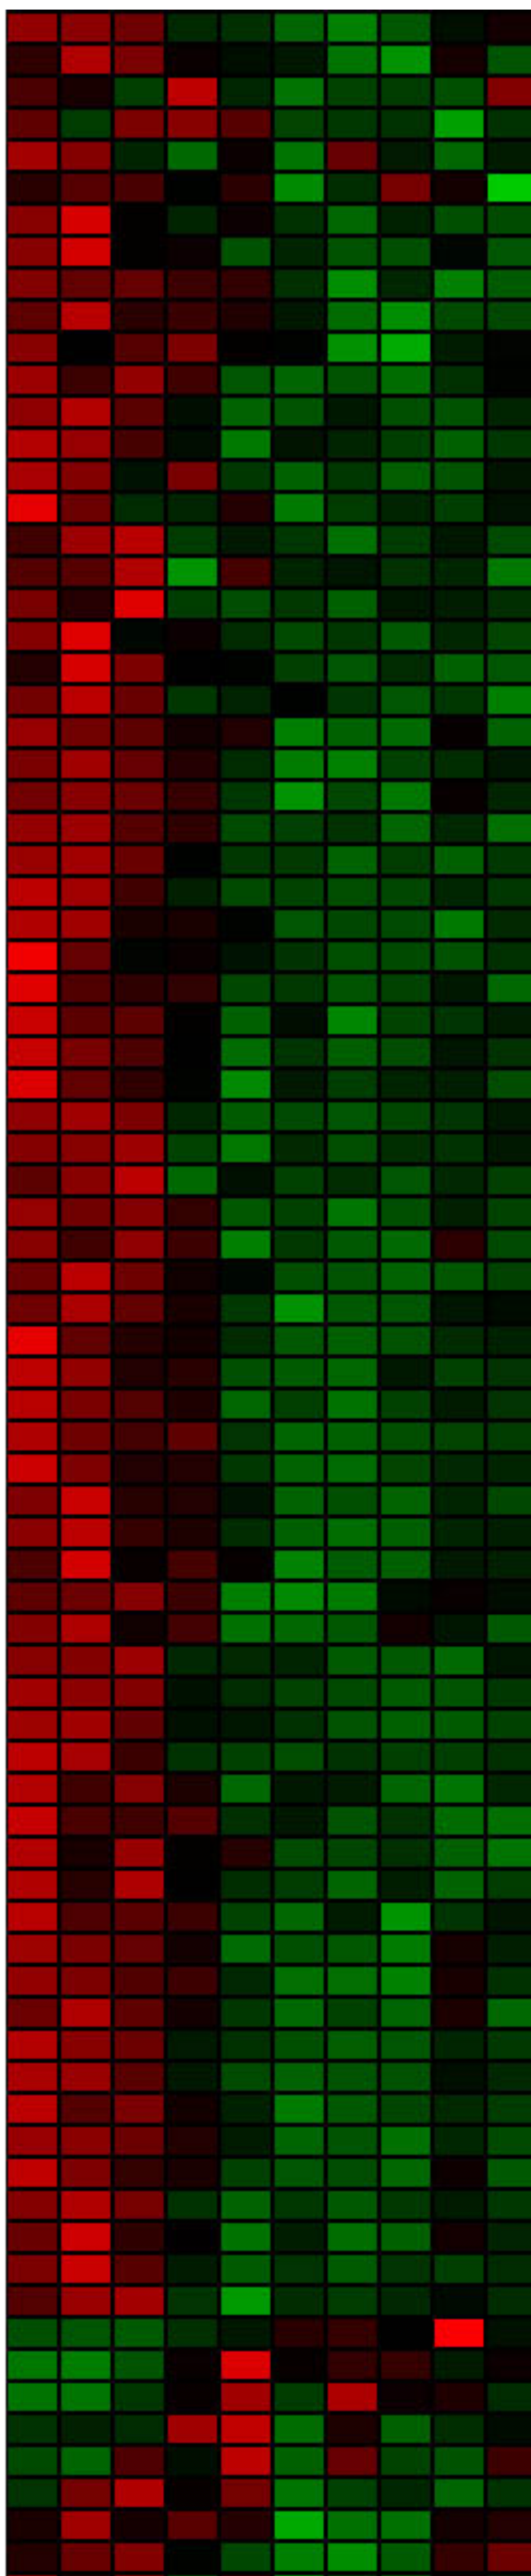

1373121\_at  
1388618\_at  
1375865\_at  
1370363\_at  
1390133\_at  
1374675\_at  
1370460\_at  
1367755\_at  
1372338\_at  
1388976\_at  
1389003\_at  
1376323\_at  
1370845\_at  
1372927\_at  
1375896\_at  
1387276\_at  
1383519\_at  
1370336\_at  
1388689\_at  
1368394\_at  
1371113\_a\_at  
1369203\_at  
1375911\_at  
1375092\_at  
1373128\_at  
1388557\_at  
1399115\_at  
1375579\_at  
1371896\_at  
1373387\_at  
1372282\_at  
1372697\_at  
1374479\_at  
1372709\_at  
1390253\_at  
1371055\_at  
1376628\_at  
1387047\_at  
1375984\_at  
1392939\_at  
1375242\_at  
1367908\_at  
1374465\_at  
1388941\_at  
1376169\_at  
1368101\_at  
1369113\_at  
1369955\_at  
1373401\_at  
1374974\_at  
1372891\_at  
1387455\_a\_at  
1373249\_at  
1389066\_at  
1372308\_at  
1388111\_at  
1390028\_at  
1368224\_at  
1369543\_s\_at  
1371815\_at  
1372449\_at  
1387809\_at  
1388142\_at  
1372868\_at  
1374524\_at  
1369632\_a\_at  
1372125\_at  
1369422\_at  
1371293\_at  
1388961\_at  
1374218\_at  
1374166\_at  
1368762\_at  
1374491\_at  
1376925\_at  
1368453\_at  
1388905\_at  
1376447\_at  
1370556\_at  
1387719\_at

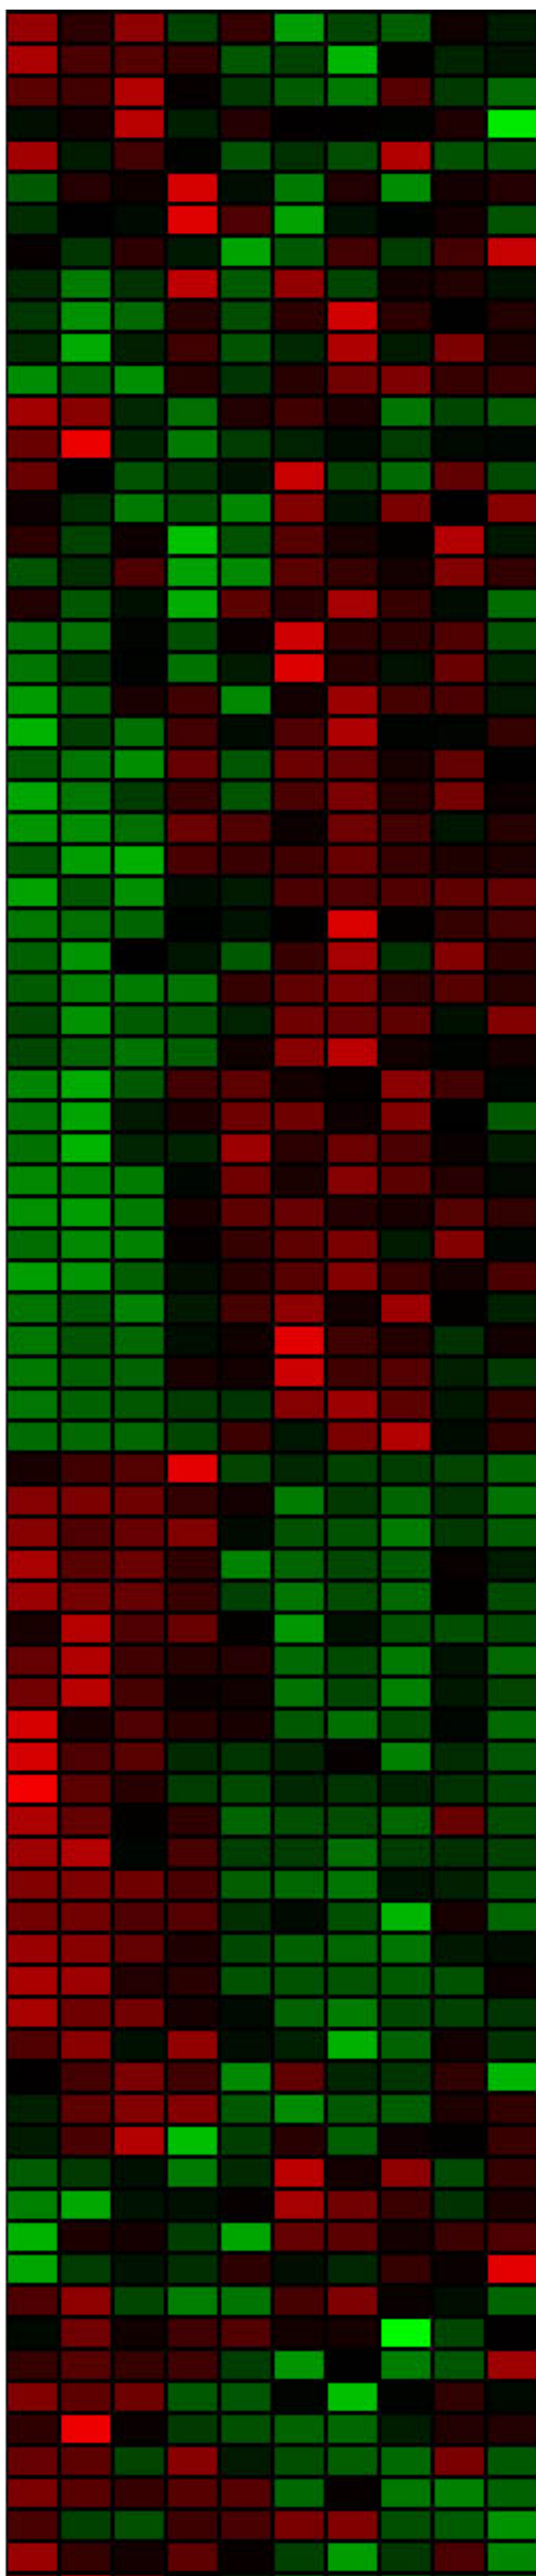

1368946\_at  
1376963\_at  
1373734\_at  
1368012\_at  
1371225\_at  
1377020\_at  
1367708\_a\_at  
1368778\_at  
1374535\_at  
1389149\_at  
1372747\_at  
1388934\_at  
1372849\_at  
1377504\_at  
1390290\_at  
1375363\_at  
1371066\_at  
1373727\_at  
1373243\_at  
1398434\_at  
1389757\_at  
1387402\_at  
1388951\_at  
1370186\_at  
1372825\_at  
1384391\_at  
1373994\_at  
1370356\_at  
1388847\_at  
1386998\_at  
1372700\_at  
1373778\_at  
1373302\_at  
1375199\_at  
1399008\_at  
1373869\_at  
1373191\_at  
1375216\_at  
1389517\_at  
1386376\_at  
1368641\_at  
1386927\_at  
1374434\_at  
1392467\_at  
1374678\_at  
1370510\_a\_at  
1368163\_at  
1368172\_a\_at  
1367970\_at  
1371762\_at  
1370312\_at  
1374543\_at  
1388054\_a\_at  
1373628\_at  
1369652\_at  
1371354\_at  
1373750\_at  
1370739\_x\_at  
1373295\_at  
1383532\_at  
1370068\_at  
1374310\_at  
1372176\_at  
1374777\_at  
1371892\_at  
1389018\_at  
1379303\_at  
1373398\_at  
1374534\_at  
1398352\_at  
1374916\_at  
1389760\_at  
1399136\_at  
1369484\_at  
1374635\_at  
1372840\_at  
1376886\_at  
1376764\_at  
1371017\_at  
1387820\_at

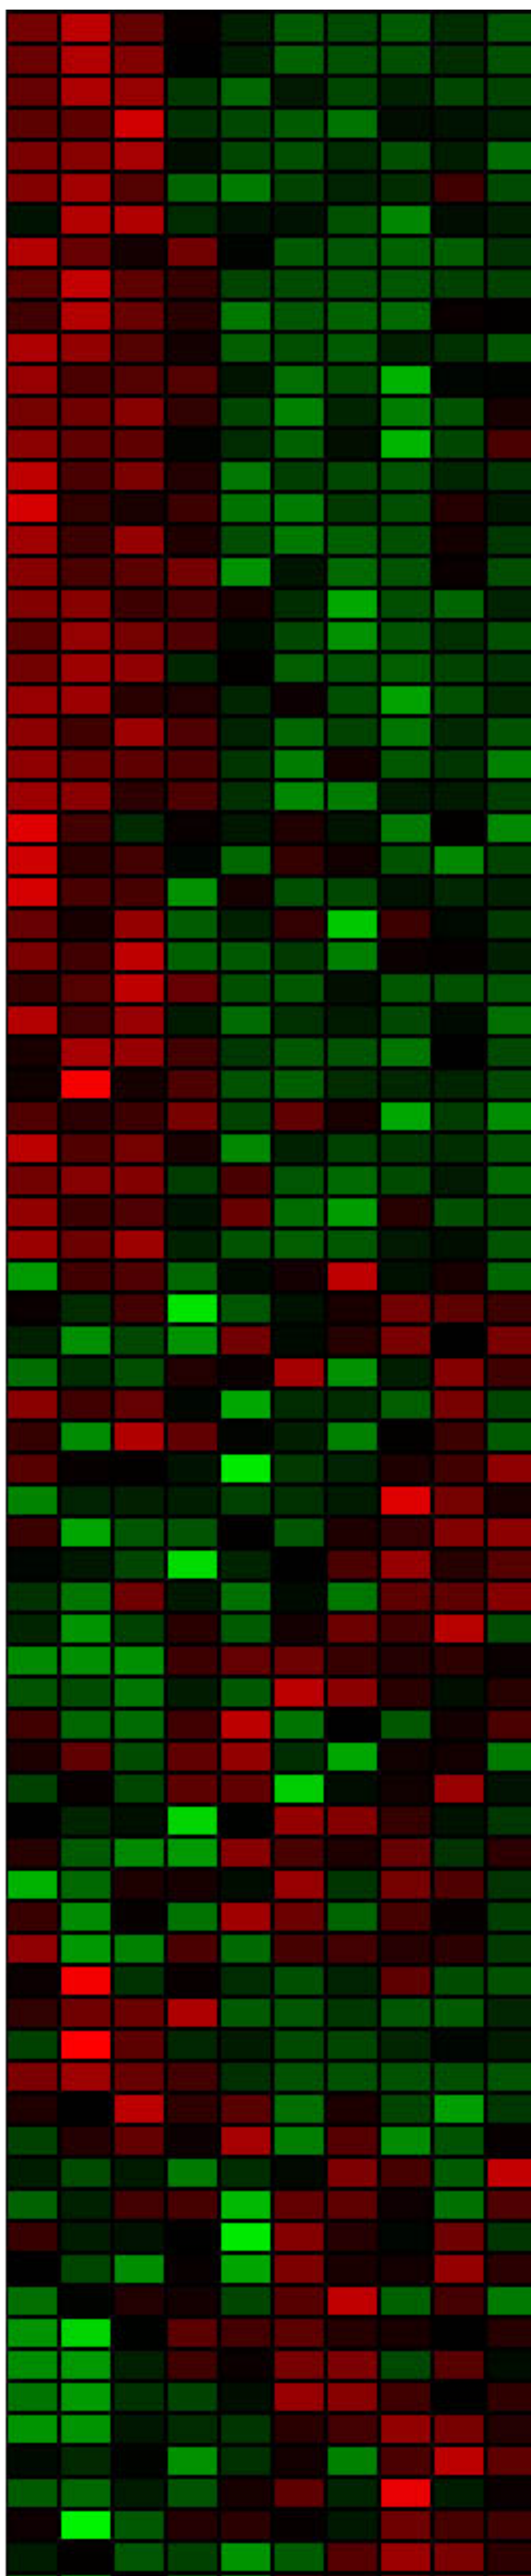

1384211\_at  
1368657\_at  
1373710\_at  
1374020\_at  
1390215\_at  
1370824\_at  
1374235\_at  
1376905\_at  
1368347\_at  
1370508\_a\_at  
1373803\_a\_at  
1368293\_at  
1389695\_at  
1368670\_a\_at  
1372276\_at  
1376892\_at  
1374187\_at  
1376920\_at  
1369550\_at  
1393130\_at  
1370355\_at  
1375815\_at  
1376350\_at  
1371677\_at  
1392742\_at  
1370461\_at  
1371765\_at  
1373297\_at  
1376104\_at  
1384466\_at  
1373762\_a\_at  
1387349\_at  
1370342\_at  
1376084\_a\_at  
1374957\_at  
1369068\_at  
1386160\_at  
1388006\_at  
1370989\_at  
1374123\_at  
1390595\_at  
1381356\_at  
1383684\_at  
1370447\_at  
1377921\_at  
1371142\_at  
1378945\_at  
1386237\_at  
1377529\_at  
1371031\_at  
1387471\_at  
1377449\_at  
1372087\_at  
1388263\_at  
1371161\_at  
1377428\_at  
1377477\_at  
1369806\_at  
1388036\_a\_at  
1371153\_a\_at  
1375821\_at  
1374488\_at  
1370858\_at  
1388984\_at  
1367558\_x\_at  
1367554\_at  
1377201\_at  
1386837\_x\_at  
1374053\_at  
1377498\_at  
1368370\_at  
1394225\_at  
1375600\_at  
1375776\_at  
1387821\_at  
1369972\_at  
1377443\_at  
1387453\_at  
1377601\_at  
1376520\_at



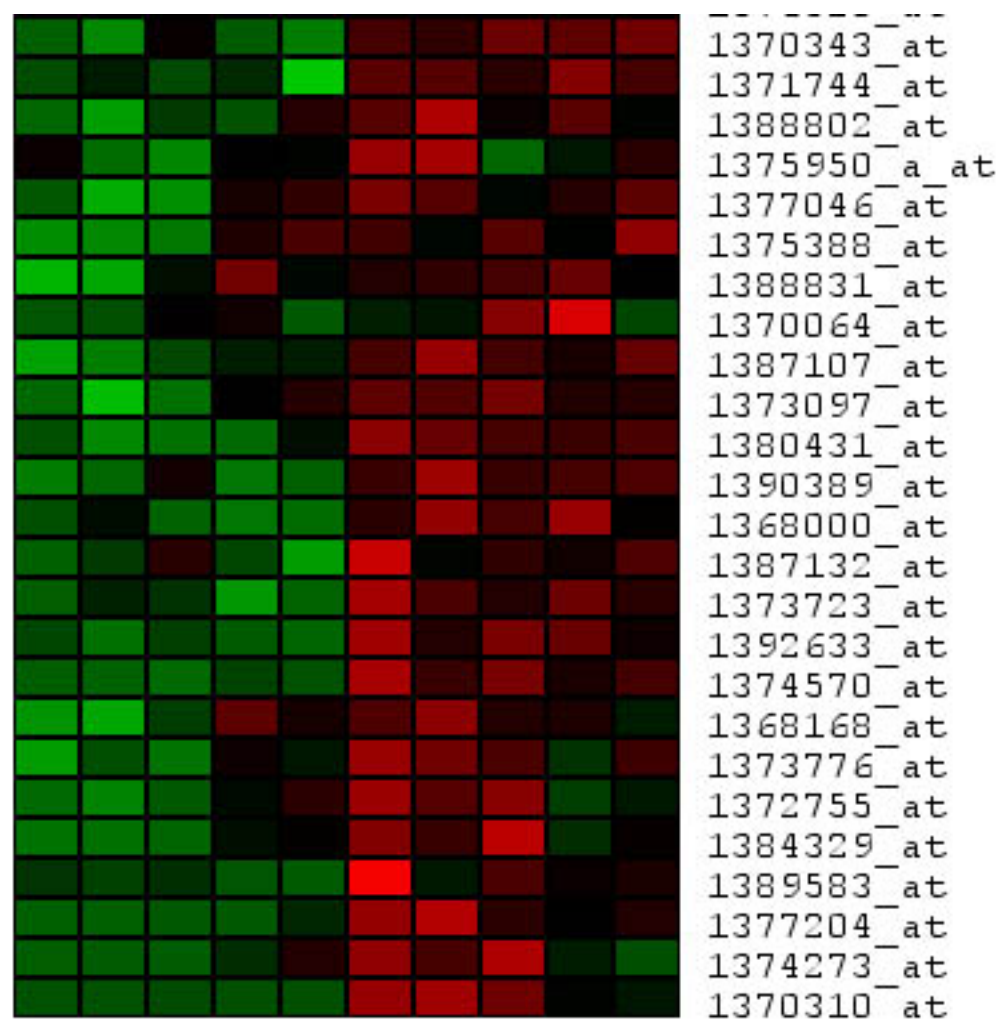

**Supplemental Display of Array Data: TIGR MeV 3.1 software based hierarchical clustering of all control (HWC) and diabetic (HWS) samples using expression values (from the Affymetrix CHP files) for those genes considered significant. The above heat map displays those genes considered significant. The included CHP values for each gene/row were normalized using MeV for display purposes.**
